# Supplementary material for: Parallel and serial mediation analysis between pain, anxiety, depression, fatigue and nausea, vomiting and retching within a randomised controlled trial in patients with breast and prostate cancer
Source: PubMed Central journal article supplement — BMJ Open. 2019 Jan 24;9(1):e026809. doi: 10.1136/bmjopen-2018-026809 (PMC6347855; doi:10.1136/bmjopen-2018-026809), 2019-01-24
Supplement: bmjopen-2018-026809.draft_revisions.pdf [file bmjopen-2018-026809.draft_revisions.pdf]

# BMJ Open

BMJ Open is committed to open peer review. As part of this commitment we make the peer review history of every article we publish publicly available.

When an article is published we post the peer reviewers' comments and the authors' responses online. We also post the versions of the paper that were used during peer review. These are the versions that the peer review comments apply to.

The versions of the paper that follow are the versions that were submitted during the peer review process. They are not the versions of record or the final published versions. They should not be cited or distributed as the published version of this manuscript.

BMJ Open is an open access journal and the full, final, typeset and author-corrected version of record of the manuscript is available on our site with no access controls, subscription charges or pay-per-view fees (<http://bmjopen.bmj.com>).

If you have any questions on BMJ Open's open peer review process please email [info.bmjopen@bmj.com](mailto:info.bmjopen@bmj.com)

# BMJ Open

## Revisiting the cluster of symptoms: a mediation analysis between Pain, Anxiety, Depression and Fatigue

|                               |                                                                                                                                                                                                                                                                                                           |
|-------------------------------|-----------------------------------------------------------------------------------------------------------------------------------------------------------------------------------------------------------------------------------------------------------------------------------------------------------|
| Journal:                      | <i>BMJ Open</i>                                                                                                                                                                                                                                                                                           |
| Manuscript ID                 | bmjopen-2018-026809                                                                                                                                                                                                                                                                                       |
| Article Type:                 | Research                                                                                                                                                                                                                                                                                                  |
| Date Submitted by the Author: | 20-Sep-2018                                                                                                                                                                                                                                                                                               |
| Complete List of Authors:     | Charalambous, Andreas; Cyprus University of Technology, Nursing; Turun Yliopisto, Nursing<br>Giannakopoulou, Margarita; National and Kapodistrian University of Athens, Nursing<br>Bozas, Evaggelos; National and Kapodistrian University of Athens, Nursing<br>Paikousis, Lefkios; Improvast, Statistics |
| Keywords:                     | symptom cluster, mediation analysis, prostate cancer, breast cancer                                                                                                                                                                                                                                       |
|                               |                                                                                                                                                                                                                                                                                                           |

SCHOLARONE™  
Manuscripts

Peer Review Only

1  
2  
3 **Title Page**

4  
5 **Revisiting the cluster of symptoms: a mediation analysis between Pain, Anxiety,**  
6 **Depression and Fatigue**

7  
8 Authors

9  
10 Dr Andreas Charalambous (corresponding author), RN, PhD, Cyprus University of  
11 Technology

12  
13 15<sup>th</sup> Vragadinou Street, 3041, Limassol, Cyprus

14  
15 +35725002011 (tel)

16  
17 +35725002822 (Fax)

18  
19 [Andreas.charalambous@cut.ac.cy](mailto:Andreas.charalambous@cut.ac.cy)

20  
21  
22  
23 Dr Margarita Giannakopoulou, RN, PHD, University of Athens

24  
25 123 Papadiamantopoulou Str, Athens Greece

26  
27 [mgiannak@nurs.uoa.gr](mailto:mgiannak@nurs.uoa.gr)

28  
29  
30  
31 Dr Evangelos Bozas, PhD, University of Athens

32  
33 123 Papadiamantopoulou Str, Athens Greece

34  
35 [ebozas@nurs.uoa.gr](mailto:ebozas@nurs.uoa.gr)

36  
37  
38  
39 Dr Lefkios Paikousis, PhD (Statistics),

40  
41 Arkadias 7, Office 206, Nicosia 1048, Cyprus

42  
43 [lefkiospaikousis@yahoo.co.uk](mailto:lefkiospaikousis@yahoo.co.uk)

44  
45  
46  
47 **Keywords:** symptom clusters, prostate cancer, breast cancer, anxiety, pain, depression,  
48 fatigue

49  
50  
51  
52 **Word count:** 3410

## Abstract

### Objective

Cancer treatment is a particularly stressful period for the patient. The reasons vary and include fear of treatment outcome as well as treatment induced side-effects. The patient frequently experiences simultaneously various somatic and psychological side-effects resulting in a diminishing of the patient's health related quality of life-HRQoL. The study provides evidence on the co-occurrence and interrelations between pain, anxiety, depression and fatigue in patients diagnosed with breast and prostate cancer.

### Design

This was a Randomised Control Trial designed to test the effectiveness of Guided Imagery and Progressive Muscle Relaxation on pain, fatigue, anxiety and depression. Non-parametric bootstrapping analyses were used to test the mediational model of Anxiety, Fatigue and Depression as parallel mediators of the relationship between Pain and HRQoL. The ClinicalTrials.gov NCT01275872

### Setting

The study was undertaken at the home setting

### Participants

In total 208 patients were included in the study (assigned equally in two groups), referred at the out-patient clinics of the three participating cancer care centres.

### Results

The three mediators fully mediate the relationship between Pain and HRQoL ( $IE_{\text{overall}} = -0.3839$ , 95% C.I.: LL=-0.5073, UL=-0.2825) indicating that patients with increased Pain are

1  
2  
3 more likely to have higher levels of Anxiety, Fatigue and Depression. Gender significantly  
4 moderated the mediational effect of Fatigue (IMM=-0.2867 SE=0.1526, LL=-0.6127, UL=-  
5 0.0226) but did not moderate mediational effect of Anxiety (IMM=-0.0709, SE=0.1414,  
6 LL=-0.3459, UL=+0.2089). The results show that the three mediators in a serial causal order  
7 fully mediate the relationship between Pain and HRQoL (IE<sub>overall</sub>=-0.384, 95% C.I.: LL=-  
8 0.51, UL=-0.284) and the ratio of the overall indirect effect to the total effect, is 0.8315 (95%  
9 CI: LL=0.5683, UL=1.1718).

## 18 **Conclusion**

20  
21 This work provides evidence that targeting fatigue, anxiety and depression may have a  
22 meaningful effect on pain as a related symptom and potentially have a positive impact on  
23 HRQoL of patients with breast cancer and prostate cancer.  
24  
25  
26  
27  
28  
29  
30  
31  
32  
33  
34  
35  
36  
37  
38  
39  
40  
41  
42  
43  
44  
45  
46  
47  
48  
49  
50  
51  
52  
53  
54  
55  
56  
57  
58  
59  
60

### Strengths and Limitations of the Study

- The study provided evidence that targeting fatigue, anxiety and depression may have a meaningful effect on pain
- The study provided evidence on the direct and indirect effects of this symptom cluster on the person's HRQoL.
- The moderated mediation analysis showed that Gender significantly moderated the mediational effect of Fatigue but did not moderate mediational effect of Anxiety.

## Introduction

Cancer treatments and cancer itself are a source of many symptoms and side-effects [1-2] It is reported that on average cancer patients experience 11 to 13 concurrent symptoms, whilst for patients with advanced disease the number can be even greater [3]. Often these symptoms are related to each other, called symptom clusters (SCs) or symptom constellations[3]. Dodd et al[4-6] defined symptom cluster as 3 concurrent and related symptoms that may or may not have a common etiology. However, the authors suggested that a cluster can be composed of just 2 or more symptoms that form a stable group[3]. Symptoms can be related through a common mechanism or etiology, by sharing common variance, or by producing different outcomes than individual symptoms. The impact of these clusters can be accumulative and debilitating for the patient and far more serious and persistent than single symptoms. They can affect the patient's overall HRQoL [7] and significantly affect the patient's sense of wellbeing and his or her physical and social functions [8]. A number of studies have tried to record the most common clusters in various cancer types[4,9], however due to the lack of agreement about a robust, clinically relevant definition of SCs, their results should be interpreted with caution. Although the groups of symptoms that tended to cluster were identified, there is limited consistency in the way in which these SCs and their associated variables were identified[1]. Preceding studies, again by drawing on the weaknesses of the clinical definition of a SC, they provide limited information towards understanding the way (or ways) the symptoms are actually correlated to each other or to other variables (i.e. HRQoL). According to the definition by Dodd et al[4] for example, a cluster of pain, fatigue and insomnia is presented as a legitimate one. However the authors supported that pain leads to fatigue and in turn insomnia and this is a rather linear representation that does not explain if these symptoms can possibly have an alternative way of interaction other than the one suggested. The same problem appears with the other SCs that have been identified so far in the literature

1  
2  
3 leaving a gap to the best understanding of this phenomenon but most importantly to the way  
4 it can be best clinically managed. When interventions are directed to ameliorate a particular  
5 symptom within a cluster, other symptoms within the cluster may be relieved. However this  
6 evidence is not available to the best of our knowledge in the relevant literature. As a result,  
7 current practice is driven based on *a priori* assumptions about the relationships among  
8 symptoms resulting in targeting the “dominant” symptom. In the previous example, pain  
9 would have been identified as a “dominant” symptom and therefore secondary attention is  
10 attributed to any other symptom that co-occurs. These *a priori* assumptions are however not  
11 based on scientific evidence but rather have been established on clinical experience.

12  
13 However, a symptom cluster experienced by the patient creates a complex condition where  
14 pain is rarely reported as a single symptom, but as a distressing symptom is reported and  
15 addressed in a timely manner. However, the lack of knowledge in the ways symptoms might  
16 correlate to each other and with other variables, the question remains whether the dominant  
17 symptom in these situations is indeed pain. The question that also arises is whether there  
18 would be a clinical benefit if for example pain and fatigue are correlated and interventions  
19 were specifically designed to target both symptoms. The researchers so far had hypothesised  
20 that it is pain and this has become the common practice dominating the current clinical  
21 management of this specific SC.

## 22 Aim

23  
24 The aim of this study was to provide evidence on the co-occurrence of and interrelations  
25 between symptoms occurring as part of a cluster in two groups of patients diagnosed with  
26 breast and prostate cancer.

## 27 Methods



1  
2  
3 The data came from a Randomised Control Trial (NCT01275872) designed to test the  
4 effectiveness of Guided Imagery (GI) and Progressive Muscle Relaxation (PMR) on a cluster  
5 of symptoms reported by patients diagnosed with breast or prostate cancer when receiving  
6 chemotherapy[10]. This study was done in compliance with the Declaration of Helsinki and  
7 the protocol was approved by the Cyprus National Bioethics Committee  
8 (CNBC/EP/2010/06). The patients reported symptoms such as fatigue, pain, nausea, vomiting  
9 and retching, anxiety and depression. Assessments included a 10-point numeric scale for  
10 pain, the Cancer Fatigue Scale (CFS)[11], Revised Rhodes index of nausea, vomiting and  
11 retching (INVR)[12] the Zung self-rating anxiety scale SAS[13] and the Beck Depression  
12 Inventory-II[14]. As with the majority of studies that explore symptom and symptom  
13 management, Quality of Life is a frequently reported outcome that has been used to  
14 demonstrate the negative impact of symptoms but also to reflect on the effectiveness of  
15 symptom management strategies. HRQoL was included in the study due to the consistent  
16 evidence in the literature that the cluster of symptoms is associated to poor levels of quality  
17 of life in patients diagnosed with cancer[15,16, 7]. Therefore, Health Related Quality of Life  
18 (HRQoL) has also being introduced in this study as a variable that can be correlated to the  
19 studied symptoms. The HRQoL of the patients was assessed with the EORTC QLQ-C30  
20 module in addition to the module BR23 for breast cancer patients and the module PR25 for  
21 prostate cancer patients.  
22  
23  
24  
25  
26  
27  
28  
29  
30  
31  
32  
33  
34  
35  
36  
37  
38  
39  
40  
41  
42  
43

44 As the rationale for this study was to test the correlations between symptoms identified as  
45 clusters, only the baseline (T0) measurements from both groups (intervention and control  
46 group) were included in the analysis. Based on predetermined criteria, 208 patients were  
47 included in the study. The sample included 104 female breast cancer patients (52 in control  
48 group + 52 in intervention group) and 104 prostate cancer patients (52 in control + 52 in  
49 intervention). The study was compliant to the Declaration of Helsinki and the protocol was  
50  
51  
52  
53  
54  
55  
56  
57  
58  
59  
60

1  
2  
3 approved by the Cyprus National BioEthics Committee (ID CNBC/EP/2010/06). All  
4 participants signed an informed consent prior to their inclusion in the study. A detail  
5 presentation of the study's methodology is presented elsewhere[17].  
6  
7  
8  
9

### 10 **Statistical analysis**

11  
12 Non-parametric bootstrapping analyses[18] were deployed to test the meditational model of  
13 Anxiety, Fatigue and Depression as parallel mediators of the relationship between Pain and  
14 HRQoL. The nausea, vomiting and retching were excluded from the analyses as these were  
15 not found to correlate with the other symptoms. In these analyses, mediation is significant if  
16 the 95% Bias Corrected and accelerated confidence intervals (Lower Limit - LL), Upper  
17 Limit (UL) for the indirect effect do not include 0[8, 18]. Moreover, separated regression  
18 analyses were deployed to explore the statistical association of Gender and Age of the patient  
19 with the HRQoL.  
20  
21  
22  
23  
24  
25  
26  
27  
28  
29

30 Three mediation models are hypothesized and explored. The first model is a gender adjusted  
31 parallel mediation model of indirect effect of Pain to HRQoL through Anxiety, Fatigue and  
32 Depression. The second model is a moderated mediation model where the indirect effects are  
33 explored on each gender (conditional indirect effects). The third model assumes a serial  
34 causal chain of the three mediators (serial mediation). Six different causal chains were  
35 explored in this model.  
36  
37  
38  
39  
40  
41  
42  
43

44 All involved variables in the analyses were standardized (z scores) before running the  
45 analyses, hence standardized coefficients are reported for the Total, Direct and Indirect  
46 effects.  
47  
48  
49  
50

51 Analysis was performed by utilising the PROCESS function v.2.16.1 in SPSS v.21. The  
52 model 4 (model as a parameter in the PROCESS function) was used for the parallel  
53  
54  
55  
56  
57  
58  
59  
60

1  
2  
3 mediation model, model 15 (moderated mediation) for the second mediation model and  
4  
5 model 6 for the serial mediation models[19].  
6

7  
8 Model fit is also reported using the following: a chi-square (df, a comparative fit index  
9  
10 (CFI)>0.90 and a root mean square error approximation (RMSEA) of <0.10. The fit indices  
11  
12 were derived using the package *lavaan* in R[20].  
13

## 14 15 **Results**

16  
17 The correlation analysis shows that HRQoL is negatively associated with Pain ( $r=-0.462$ ),  
18  
19 Fatigue ( $r=-0.601$ ), Anxiety ( $r=-0.595$ ) and Depression ( $r=-0.510$ ) indicating that lower  
20  
21 quality of life is associated with higher levels of the psychological aspects as well as Pain.  
22  
23 Furthermore, Pain is positively correlated with all psychological aspects and negatively  
24  
25 correlated with HRQoL (Table 1).  
26  
27

## 28 29 **Covariates**

30  
31 Age was not found to be statistically associated with the level of HRQoL either on the Total  
32  
33 Effects model ( $b=-1.13$   $p=0.27$ , Predictors of HRQoL: Pain, Sex, Age) or on the Direct Effect  
34  
35 model ( $b=-0.9903$   $p=0.2866$ , Predictors to HRQoL: Anxiety, Fatigue, Depression, Pain,  
36  
37 Gender, Age).  
38  
39

40  
41 Gender was found to be statistically associated with the HRQoL in the Total Effects model  
42  
43 ( $b=-7.2972$   $p=0.0143$ ) indicating that female patients experienced lower quality of life  
44  
45 compared to male patients. Therefore, gender which in this study also reflects the type of  
46  
47 cancer, is included in the mediation models as a statistical control variable.  
48  
49

## 50 51 **Parallel mediation model**

52  
53 Results based on 5000 bootstrapped samples indicated that, controlling for the gender, whilst  
54  
55 the total effect of Pain on HRQoL was significant ( $\beta_{\text{total}}=-0.4616$ ,  $SE=0.0612$ ,  $p<0.001$ ), the  
56  
57  
58  
59

1  
2  
3 direct effect was not ( $\beta_{\text{direct}}=-.0778$ ,  $SE=0.0685$ ,  $p=0.2576$ ) and indirect effects (IE) are  
4 present (Figure 1).  
5  
6

7  
8 Overall, the three mediators fully mediate the relationship between Pain and HRQoL  
9 ( $IE_{\text{overall}}=-0.3839$ , 95% C.I.:  $LL=-0.5073$ ,  $UL=-0.2825$ ) indicating that patients with increased  
10 Pain are more likely to have higher levels of Anxiety, Fatigue and Depression. Patients  
11 through the experience of high levels of Anxiety, Fatigue and Depression, are more likely to  
12 report lower levels of Quality of Life.  
13  
14  
15  
16  
17

18  
19 Two out of the three mediators were found to significantly contribute to the overall indirect  
20 effect. Specifically, there is as statistically significant indirect effect of Pain to HRQoL  
21 through Anxiety ( $IE_{\text{anxiety}}=-0.1378$ , 95% C.I.:  $LL=-0.2615$ ,  $UL=-0.0395$ ), such that  
22 participants who indicated high levels of Pain were more likely to feel Anxiety, and through  
23 high levels of Anxiety, more likely to report lower levels of HRQoL. In addition, there is as  
24 statistically significant indirect effect of Pain to HRQoL through Fatigue ( $IE_{\text{fatigue}}=-0.1856$ ,  
25 95% C.I.:  $LL=-0.2716$ ,  $UL=-0.1093$ ), such that patients who indicated high levels of Pain  
26 were more likely to feel Fatigue, and through high levels of Fatigue, more likely to report  
27 reduced HRQoL. Depression does not mediate the relationship between Pain and HRQoL  
28 ( $IE_{\text{depression}}=-0.0605$ , 95% C.I.:  $LL=-0.1575$ ,  $UL=+0.0289$ ).  
29  
30  
31  
32  
33  
34  
35  
36  
37  
38  
39  
40  
41

42 Specific indirect effect contrasts between the proposed mediators do not show statistically  
43 significant difference between the indirect effects of Anxiety and Fatigue ( $b=0.0478$ , 95% CI:  
44  $LL=-0.260$ ,  $UL=0.0822$ ). The ratio of the overall indirect effect to the total effect, is 0.8315  
45 (95% CI:  $LL=0.5683$ ,  $UL=1.1718$ ), while the ratio of the Anxiety and Fatigue indirect effects  
46 to the Total effect is 0.2985 (95% CI:  $LL=0.0758$ ,  $UL=0.5711$ ) and 0.4020 ( $LL=0.2230$ ,  
47  $UL=0.6317$ ) respectively.  
48  
49  
50  
51  
52  
53  
54

#### 55 **Moderated mediation model - Gender moderation**

56  
57  
58  
59  
60

1  
2  
3 The current analysis tests whether the indirect effect of Pain to HRQoL through Anxiety or  
4 Fatigue is moderated by Gender, i.e. whether the mediation effect observed earlier, is  
5 statistically significantly different in Males and Females.  
6  
7  
8  
9

10  
11 A moderated mediation model is explored where Anxiety and Fatigue act as parallel  
12 mediators and Gender as a moderator (Figure 1) to the mediation. The proposed model is  
13 under model 15 of the PROCESS documentation[19] where the moderation effect takes place  
14 at the B-Path (Mediator to Dependent) and at the C- path (direct path: Independent to  
15 Dependent). Model 15 (moderation effect not included to the A-path), was chosen over  
16 Model 59 (moderation effect on all paths) since separate regression analysis for the  
17 interaction of Gender to the relationship of the Independent (Pain) to the Mediators (Anxiety  
18 and Fatigue) did not reach statistical significance. The slope of the line relating the indirect  
19 effect to the moderator is the “index of moderated mediation” (IMM)[20].The statistical  
20 significance of the IMM effect is assessed along with the conditional indirect effects across  
21 each gender.  
22  
23  
24  
25  
26  
27  
28  
29  
30  
31  
32  
33  
34  
35  
36

37 Gender significantly moderated the mediational effect of Fatigue (IMM=-0.2867 SE=0.1526,  
38 LL=-0.6127, UL=-0.0226) but did not moderate mediational effect of Anxiety (IMM=-  
39 0.0709, SE=0.1414, LL=-0.3459, UL=+0.2089). This means that there is a meaningful  
40 difference in the magnitude of the conditional indirect effects of each gender in the mediation  
41 effect of Pain to HRQoL through Anxiety. Specifically, we observe that for Males the  
42 conditional indirect effect is trivial and not statistically significant ( $\beta=0.0746$ , SE=0.1474,  
43 LL=-0.1893, UL=+0.3853) but for Females the conditional indirect effect is stronger than  
44 Males' and statistically significant ( $\beta=-0.2121$ , SE=0.0434, LL=-0.307, UL=-0.1351) (Table  
45 2). Fatigue is a significant mediator to the relationship between Pain and HRQoL for Females  
46  
47  
48  
49  
50  
51  
52  
53  
54  
55  
56  
57  
58  
59  
60

1  
2  
3 rather than Males. There is no meaningful difference in the mediating effect of Anxiety for  
4  
5 the relationship between Pain and HRQoL between Males and Females.  
6  
7  
8  
9

### 10 **Serial mediation model**

11  
12  
13 Serial mediation hypothesizes a causal chain linking of the mediators (Anxiety, Fatigue,  
14  
15 Depression), with a specified direction flow. For example, Pain, could increase Anxiety,  
16  
17 which in turn increases Depression which could in turn increase Fatigue and thus decrease  
18  
19 Quality of Life. (i.e., Pain->Anxiety->Depression-Fatigue->HRQoL).  
20  
21

22  
23 The results show that the three mediators in a serial causal order (any order that is) **fully**  
24  
25 **mediate** the relationship between Pain and HRQoL ( $IE_{\text{overall}}=-0.384$ , 95% C.I.: LL=-0.51,  
26  
27 UL=-0.284) and the ratio of the overall indirect effect to the total effect, is 0.8315 (95% CI:  
28  
29 LL=0.5683, UL=1.1718). The total indirect effect and the ratio to the total effect, both are the  
30  
31 same as in the parallel mediation model explored earlier.  
32  
33

34  
35 Since three mediators were used, six different causal order models were produced (Table 3).  
36  
37 All six models were compared in terms of the significant path created by each different  
38  
39 causal order of the mediators. SMM 1, SMM 2 and SMM 4 yielded only three significant  
40  
41 indirect paths out of the 7 possible paths, whereas SMM 3, SMM 5 and SMM6 yielded 4, 5  
42  
43 and 6 significant paths respectively.  
44

45  
46 SMM 3, SMM 5 and SMM 6 yielded a significant indirect path involving all 3 mediators in a  
47  
48 causal chain. The path *Pain->Depression->Anxiety->Fatigue->HRQoL* in SMM 3 yielded  
49  
50 the highest ratio of indirect to total effect; 0.126 (95% C.I.: 0.056-0.248) among the three  
51  
52 models (Table 3).  
53  
54  
55  
56  
57  
58  
59  
60

1  
2  
3 The indirect paths involving *Fatigue* and *Depression* (one after the other and vice-versa)  
4 were statistically significant in 1 out of the 6 SMMs and specifically in SMM6.  
5  
6

7  
8 The indirect paths involving *Anxiety* and *Depression* (one after the other and vice-versa) was  
9 statistically significant in 3 out of the 6 SMMs and specifically in SMM3, SMM5, and  
10 SMM6  
11  
12

13  
14  
15 The indirect paths involving *Fatigue* and *Anxiety* (one after the other and vice-versa) were  
16 statistically significant in all SMMs. This result means that increased Pain increases Fatigue  
17 (or Anxiety) which in turn increase Anxiety (or Fatigue) resulting in a decreased Quality of  
18 Life. The serial causal effect of these two mediators was found significant in any casual order  
19 of the mediators in place.  
20  
21  
22  
23  
24  
25

26  
27 Figure 3 depicts the effects of the direct paths linking pain to each mediator and among  
28 mediators resulting from the SMM 6 in which all the direct and indirect effects are  
29 statistically significant. The positive signs (+ve) of the effects are indicative of the increased  
30 Anxiety, Fatigue and Depression that increased Pain causes. Moreover, it shows that  
31 increased levels of each mediator is associated with a positive effect (i.e. increase) in the  
32 levels of the mediator with a direct connection. All indirect paths from Pain to HRQoL are  
33 negative, showing the reduction in HRQoL levels through the increase in the levels of the  
34 mediators. The SMM 6 results show that the worst the Pain was the more it would contribute  
35 to Depression, higher depression resulted to higher Fatigue, higher Fatigue led to higher  
36 levels of Anxiety which in turn contributed to lower HRQoL.  
37  
38  
39  
40  
41  
42  
43  
44  
45  
46  
47  
48

## 49 **Discussion**

50  
51  
52 The aim of this study was to explore the correlations between symptoms that were reported  
53 by two cancer patient groups and HRQoL. We specifically aimed to demonstrate that pain,  
54  
55  
56  
57  
58  
59  
60

1  
2  
3 depression, fatigue, and anxiety co-occur as a symptom cluster over the course of breast  
4 cancer and prostate cancer treatment. Findings indicate that with the exception of nausea,  
5 vomiting and retching, the symptoms of pain, fatigue, anxiety and depression formed a  
6 common symptom cluster in both breast and prostate cancer patients. The findings also  
7 showed that HRQoL is negatively associated with pain, fatigue, anxiety and depression. This  
8 suggests that with these two groups of patients the symptoms consisting of the cluster need to  
9 be addressed collectively not only emphasizing on pain management but also focusing on  
10 depression, anxiety and fatigue. This provides a more comprehensive symptom management  
11 to the patient with also a positive effect on the HRQoL.  
12  
13  
14  
15  
16  
17  
18  
19  
20  
21  
22

23 Parallel, serial and moderate mediation analyses yielded interesting results in relation to  
24 symptom correlations. Parallel mediation analysis showed that the three mediators (fatigue,  
25 anxiety, and depression) fully mediate the relationship between Pain and HRQoL. However,  
26 whilst Anxiety and Fatigue were found to significantly contribute to the overall indirect  
27 effect, Depression did not mediate the relationship between Pain and HRQoL. Although the  
28 data used for the analysis cannot support a definite model as these data were not longitudinal,  
29 however it does suggest that researchers and clinicians should consider these alternative  
30 correlations between symptoms and HRQoL. For example, gender significantly moderated  
31 the mediational effect of Fatigue but not Anxiety. Therefore, for Males (i.e. prostate cancer  
32 patients) conditional indirect effect is minimal but for Females (i.e. breast cancer patients) the  
33 effect is stronger and statistically significant. With the existence of many complex variable  
34 correlations being recorded in the literature in isolated symptom studies, these new findings  
35 suggest that conflicts in preceding studies may be resolved by the increased understanding of  
36 variable interaction in symptom clustering.  
37  
38  
39  
40  
41  
42  
43  
44  
45  
46  
47  
48  
49  
50  
51  
52

53  
54 The exact underlying mechanisms by which symptoms correlate with each other are not to  
55 this date fully understood and this is an area that could contribute in the comprehensive  
56  
57  
58  
59  
60



1  
2  
3 management of symptom clusters through the development of effective multimodal  
4 interventions for breast and prostate cancer patients for use in the active treatment phase. A  
5 variety of non-pharmacological interventions have been proposed for treating pain, fatigue,  
6 depression and anxiety including exercise, psychosocial, cognitive behavioural, and  
7 nutritional[22-24]. However, most of these recommendations are proposed for use in single  
8 symptom management, perhaps with the exception of guided imagery and progressive muscle  
9 relaxation that its effectiveness was also tested in symptom cluster[17]. Further research is  
10 needed towards examining whether multimodal interventions can reduce pain and, in turn,  
11 reduce depression, fatigue and anxiety.  
12  
13  
14  
15  
16  
17  
18  
19  
20  
21  
22

23 Clinical decision making in symptom management is traditionally driven by the type of the  
24 symptom rather than its impact on the patient or its correlations to other symptoms that might  
25 simultaneously be present. Preceding studies[25] consistently showed that emphasis is given  
26 on pain management rather than management of other symptoms such as fatigue or anxiety  
27 within a clinical situation where a symptom cluster manifests. The main problem with these  
28 patterns in symptom management is that despite the knowledge that symptoms co-exist; these  
29 are prioritised according to perceived importance. However, the correlation between the  
30 symptoms is purposively not taken into consideration including the likelihood that by treating  
31 for example Fatigue in breast cancer patients, the results of any pain management  
32 intervention might be fortified as well as the positive impact on HRQoL. On the same  
33 example, treating Fatigue in prostate cancer patients will most likely have no accumulating  
34 effect on the patient's responsiveness to pain management interventions. This example  
35 highlights that within the clinical setting such clinical decision making has also an impact on  
36 the cost-effectiveness of the symptom management interventions, as resources can be  
37 purposively allocated to other symptoms or variables that mediate pain and HRQoL to  
38 maximise clinical management.  
39  
40  
41  
42  
43  
44  
45  
46  
47  
48  
49  
50  
51  
52  
53  
54  
55  
56  
57  
58  
59  
60

1  
2  
3 The study has some limitations. The main limitation is the small sample size; however,  
4 several statistically significant paths emerged and within-symptom paths were replicated  
5 across both study samples (i.e cancer type groups). The unavailability of longitudinal data  
6 limits the support of a definite model, which would demonstrate if the correlations between  
7 symptoms found in this study are stable over time. However, the fact that the patients in the  
8 study were all in the active treatment phase strengthens the generalisability of the results to  
9 patients with prostate and breast cancer during this phase.  
10  
11  
12  
13  
14  
15  
16  
17

18 The study demonstrated that pain, depression, fatigue, and anxiety tend to co-occur during the  
19 treatment phase, thus providing further evidence for this symptom cluster in two distinct  
20 samples of breast and prostate cancer patients. The study also showed the direct and indirect  
21 effects of this symptom cluster on the person's HRQoL. Parallel mediation analysis showed  
22 that the three mediators (fatigue, anxiety, and depression) fully mediate the relationship  
23 between Pain and HRQoL. Similarly, in a serial causal order, the three mediators fully  
24 mediate the relationship between Pain and HRQoL. The moderated mediation analysis  
25 showed that Gender significantly moderated the mediational effect of Fatigue but did not  
26 moderate mediational effect of Anxiety. There are explicit clinical implications of the study's  
27 findings that include assessment, prevention, and intervention for anxiety, depression, fatigue  
28 and pain related to breast and prostate cancer treatment. This work provides preliminary  
29 evidence that targeting fatigue, anxiety and depression may have a meaningful effect on pain  
30 as a related symptom and potentially have a positive impact on HRQoL of patients with  
31 breast cancer and prostate cancer.  
32  
33  
34  
35  
36  
37  
38  
39  
40  
41  
42  
43  
44  
45  
46  
47  
48

#### 49 Funding

50  
51  
52 This work was supported by the Cyprus University of Technology. Improvast provided  
53 support in the form of salaries for author LP.  
54  
55  
56  
57  
58  
59  
60

1  
2  
3 Data Statement  
4

5  
6 Data are available from the Cyprus University of Technology given that the Cyprus National  
7  
8 BioEthics Committee will grant access to data for researchers who meet the criteria doe  
9  
10 access to confidential data. Data requests can be sent to the corresponding author at  
11  
12 [andreas.charalambous@cut.ac.cy](mailto:andreas.charalambous@cut.ac.cy)  
13  
14

15 Author Statement  
16

17  
18 The authors of this paper have directly participated in all the stages of its preparation.  
19  
20 Authorship statement: AC conceived and designed the study, analyzed, interpreted the data  
21  
22 and approved the final manuscript. MG prepared all the draft versions of the manuscript.  
23  
24 YM, PK recruited the participants, interpreted the data and edited and approved the final  
25  
26 version of the manuscript. AC, MG, EB collected the data. LP performed the statistical  
27  
28 analysis and interpretation of the data. AC, MG, LP interpreted the data, edited and approved  
29  
30 the final version of the manuscript. AC, LP were responsible for the financial support.  
31  
32  
33  
34  
35  
36  
37  
38  
39  
40  
41  
42  
43  
44  
45  
46  
47  
48  
49  
50  
51  
52  
53  
54  
55  
56  
57  
58  
59  
60

## References

1. Dong ST, Butow PN, Costa DSJ, et al: Symptom clusters in patients with advanced cancer: a systematic review of observational studies. *J Pain Symptom Manage* 48:411–450, 2014
2. Kim H-J, McGuire DB, Tulman L, et al: Symptom clusters: concept analysis and clinical implications for cancer nursing. *Cancer Nurs* 28:270–282, 2005
3. Miaskowski C, Dodd M, Lee K: Symptom Clusters: The New Frontier in Symptom Management Research [Internet]. *J Natl Cancer Inst Monogr* 2004:17–21,
4. Dodd MJ, Miaskowski C, Paul SM: Symptom clusters and their effect on the functional status of patients with cancer. [Internet]. *Oncol Nurs Forum* 28:465–70, 2001
5. Dodd M, Janson S, Facione N, et al: Advancing the science of symptom management. *J Adv Nurs* 33:668–676, 2001
6. Dodd MJ, Miaskowski C, Lee KA: Occurrence of symptom clusters. *J Natl Cancer Inst Monogr* 2004:76–78, 2004
7. Dong ST, Costa DSJ, Butow PN, et al: Symptom clusters in advanced cancer patients: an empirical comparison of statistical methods and the impact on quality of life. *J Pain Symptom Manage* 51:88–98, 2016
8. Preacher KJ, Rucker DD, Hayes AF: Addressing moderated mediation hypotheses: Theory, methods, and prescriptions. *Multivariate Behav Res* 42:185–227, 2007
9. Cheung WY, Le LW, Zimmermann C: Symptom clusters in patients with advanced cancers. *Support care cancer* 17:1223–1230, 2009

10. Charalambous A, Giannakopoulou M, Bozas E, et al: Guided imagery and progressive muscle relaxation as a cluster of symptoms management intervention in patients receiving chemotherapy: A randomized control trial. *PLoS One* 11:1–18, 2016
11. Chang VT, Hwang SS, Feuerman M, et al: Symptom and quality of life survey of medical oncology patients at a veterans affairs medical center [Internet]. *Cancer* 88:1175–1183, 2000
12. Rhodes VA, McDaniel RW. The Index of Nausea, Vomiting, and Retching: a new format of the Index of nausea and vomiting. *Oncol Nurs Forum* 1999; 26:889-93
13. Zung, W. W. K. A rating instrument for anxiety disorders. *Psychosomatics* 1971; 12(6), 371–379.
14. Beck, A.T., Steer, R.A., & Brown, G.K. Manual for the Beck Depression Inventory-II. San Antonio, TX: Psychological Corporation, 1996.
15. Nho J-H, Reul Kim S, Nam J-H: Symptom clustering and quality of life in patients with ovarian cancer undergoing chemotherapy [Internet]. *Eur J Oncol Nurs* 30:8–14, 2017
16. Choi S, Ryu E: Effects of symptom clusters and depression on the quality of life in patients with advanced lung cancer. *Eur J Cancer Care (Engl)* , 2016
17. Charalambous A, Giannakopoulou M, Bozas E, et al: A Randomized Controlled Trial for the Effectiveness of Progressive Muscle Relaxation and Guided Imagery as Anxiety Reducing Interventions in Breast and Prostate Cancer Patients Undergoing Chemotherapy. *Evidence-based Complement Altern Med* 2015, 2015
18. Preacher KJ, Hayes AF: SPSS and SAS procedures for estimating indirect effects in simple mediation models. *Behav Res Methods* 36:717–731, 2004

- 1  
2  
3 19. Hayes AF: Introduction to Mediation, Moderation, and Conditional Process Analysis : A  
4 Regression-Based Approach. New York, The Guilford Press, 2013  
5  
6  
7  
8 20. Rosseel Y. lavaan: An R Package for Structural Equation Modeling. *Journal of Statistical*  
9 *Software* 48(2): 1-36, 2012.  
10  
11  
12  
13 21. Hayes AF: An Index and Test of Linear Moderated Mediation. *Multivariate Behav Res*  
14 50:1–22, 2015  
15  
16  
17  
18 22. Wengström Y, Bolam KA, Mijwel S, et al: Optitrain: a randomised controlled exercise  
19 trial for women with breast cancer undergoing chemotherapy. *BMC Cancer* 17:100, 2017  
20  
21  
22  
23 23. Finnegan-John J, Molassiotis A, Richardson A, Ream E. A systematic review of  
24 complementary and alternative medicine interventions for the management of cancer-related  
25 fatigue. *Integr Cancer Ther.* 2013;12:276-290  
26  
27  
28  
29  
30 24. Salas AS & Contreras JF, Armijo-Olivo S, Saltaji H, Watanabe S, Chambers T, Walter L,  
31 Cummings GG. Non-pharmacological cancer pain interventions in populations with social  
32 disparities: a systematic review and meta-analysis. *Support Care Cancer* 2015  
33 DOI 10.1007/s00520-015-2998-9  
34  
35  
36  
37  
38  
39 25. Wilkie DJ, Ezenwa MO: Pain and symptom management in palliative care and at end of  
40 life. *Nurs Outlook* 60:357–364, 2012  
41  
42  
43  
44  
45  
46  
47  
48  
49  
50  
51  
52  
53  
54  
55  
56  
57  
58  
59  
60

**Table 1: Pearson correlation coefficients between the variables**

|            | Pain    | Fatigue | Anxiety | Depression | HRQoL |
|------------|---------|---------|---------|------------|-------|
| Pain       | 1       |         |         |            |       |
| Fatigue    | ,567**  | 1       |         |            |       |
| Anxiety    | ,590**  | ,715**  | 1       |            |       |
| Depression | ,541**  | ,565**  | ,735**  | 1          |       |
| HRQoL      | -,462** | -,601** | -,595** | -,510**    | 1     |

\*\* p&lt;0.001

For peer review only

**Table 2: Conditional indirect effect(s) of PAIN on HRQoL at Gender and Index of Moderated Mediation**

| Mediators | Moderator (Gender) | $\beta$ (SE)       | 95% Confidence Interval |
|-----------|--------------------|--------------------|-------------------------|
| Anxiety   | Male               | 0.1324 (0.1314)    | (-0.4076, 0.1138)       |
|           | Female             | -0.2033 (0.0578) * | (-0.3315, -0.1026)      |
| Fatigue   | Male               | 0.0746 (0.1463)    | (-0.2015, 0.3574)       |
|           | Female             | -0.2121 (0.0436) * | (-0.3034, -0.1282)      |

  

| <u>Moderated Mediation Index</u> |                   |                         |
|----------------------------------|-------------------|-------------------------|
| Mediator                         | $\beta$ (SE)      | 95% Confidence Interval |
| Anxiety                          | -0.0709 (0.143)   | (-0.3583, 0.2094)       |
| Fatigue                          | -0.2867 (0.156) * | (-0.5996, -0.0057)      |

\* $p < 0.05$ , Bias corrected bootstrapped Confidence Intervals, 5000 bootstrap samples. Statistically significant moderated mediation occurs only for Fatigue. Although there is a significant conditional indirect effect for Females through the mediator Anxiety, the difference between the conditional indirect effect for Males is not significantly different than that of the Females.



Table 3: Standardised indirect effects and ratio of indirect to total effects for the paths on the serial mediation models.

|                                                               | Indirect effects of Pain on HRQoL |                                | Ratio of indirect to total effect |                                |
|---------------------------------------------------------------|-----------------------------------|--------------------------------|-----------------------------------|--------------------------------|
|                                                               | b (boot SE)                       | BC 95% CI [LB-UB] <sup>†</sup> | b (boot SE)                       | BC 95% CI [LB-UB] <sup>†</sup> |
| <b>SMM1: PN -&gt; AXT -&gt; DEP -&gt; FTG -&gt; HRQoL</b>     |                                   |                                |                                   |                                |
| <b>PN -&gt; AXT -&gt; HRQoL</b>                               | -0,138 (0,057)                    | (-0,268, -0,04)                | 0,299 (0,126)                     | (0,082, 0,581)                 |
| PN -> AXT -> DEP -> HRQoL                                     | -0,042 (0,033)                    | (-0,109, 0,022)                | 0,091 (0,074)                     | (-0,049, 0,239)                |
| <b>PN -&gt; AXT -&gt; FTG -&gt; HRQoL</b>                     | -0,108 (0,032)                    | (-0,186, -0,057)               | 0,234 (0,077)                     | (0,114, 0,424)                 |
| PN -> AXT -> DEP -> FTG -> HRQoL                              | -0,004 (0,01)                     | (-0,028, 0,013)                | 0,009 (0,022)                     | (-0,029, 0,063)                |
| PN -> DEP -> HRQoL                                            | -0,018 (0,018)                    | (-0,069, 0,005)                | 0,04 (0,04)                       | (-0,012, 0,153)                |
| PN -> DEP -> FTG -> HRQoL                                     | -0,002 (0,005)                    | (-0,019, 0,005)                | 0,004 (0,011)                     | (-0,01, 0,041)                 |
| <b>PN -&gt; FTG -&gt; HRQoL</b>                               | -0,071 (0,024)                    | (-0,13, -0,033)                | 0,154 (0,056)                     | (0,07, 0,296)                  |
| <b>SMM2: PN -&gt; FTG -&gt; AXT-DEP -&gt; HRQoL</b>           |                                   |                                |                                   |                                |
| <b>PN -&gt; FTG -&gt; HRQoL</b>                               | -0,186 (0,042)                    | (-0,272, -0,11)                | 0,299 (0,126)                     | (0,082, 0,581)                 |
| <b>PN -&gt; FTG -&gt; AXT -&gt; HRQoL</b>                     | -0,074 (0,032)                    | (-0,146, -0,023)               | 0,244 (0,077)                     | (0,119, 0,427)                 |
| PN -> FTG -> DEP -> HRQoL                                     | -0,002 (0,006)                    | (-0,022, 0,006)                | 0,088 (0,074)                     | (-0,047, 0,241)                |
| PN -> FTG -> AXT -> DEP -> HRQoL                              | -0,022 (0,018)                    | (-0,063, 0,011)                | 0,003 (0,008)                     | (-0,007, 0,029)                |
| <b>PN -&gt; AXT -&gt; HRQoL</b>                               | -0,064 (0,03)                     | (-0,141, -0,018)               | 0,158 (0,058)                     | (0,071, 0,304)                 |
| PN -> AXT -> DEP -> HRQoL                                     | -0,019 (0,017)                    | (-0,062, 0,008)                | 0,002 (0,005)                     | (-0,004, 0,024)                |
| PN -> DEP -> HRQoL                                            | -0,018 (0,017)                    | (-0,067, 0,005)                | 0,038 (0,039)                     | (-0,012, 0,147)                |
| <b>SMM3: PN -&gt; DEP&gt;AXT -&gt; FTG-- -&gt; HRQoL</b>      |                                   |                                |                                   |                                |
| PN -> DEP -> HRQoL                                            | -0,061 (0,048)                    | (-0,156, 0,03)                 | 0,131 (0,106)                     | (-0,072, 0,343)                |
| <b>PN -&gt; DEP -&gt; AXT -&gt; HRQoL</b>                     | -0,074 (0,031)                    | (-0,15, -0,021)                | 0,161 (0,07)                      | (0,044, 0,324)                 |
| PN -> DEP -> FTG -> HRQoL                                     | -0,006 (0,015)                    | (-0,043, 0,018)                | 0,014 (0,032)                     | (-0,038, 0,094)                |
| <b>PN -&gt; DEP -&gt; AXT -&gt; FTG -&gt; HRQoL</b>           | -0,058 (0,019)                    | (-0,105, -0,028)               | 0,126 (0,047)                     | (0,057, 0,248)                 |
| <b>PN -&gt; AXT -&gt; HRQoL</b>                               | -0,064 (0,029)                    | (-0,138, -0,019)               | 0,138 (0,065)                     | (0,042, 0,306)                 |
| <b>PN -&gt; AXT -&gt; FTG -&gt; HRQoL</b>                     | -0,05 (0,017)                     | (-0,094, -0,025)               | 0,108 (0,038)                     | (0,053, 0,212)                 |
| PN -> FTG -> HRQoL                                            | -0,071 (0,024)                    | (-0,13, -0,033)                | 0,154 (0,056)                     | (0,07, 0,296)                  |
| <b>SMM4: PN -&gt; AXT -&gt; FTG -&gt; DEP&gt; -&gt; HRQoL</b> |                                   |                                |                                   |                                |
| <b>PN -&gt; AXT -&gt; HRQoL</b>                               | -0,138 (0,056)                    | (-0,262, -0,04)                | 0,299 (0,125)                     | (0,076, 0,578)                 |
| <b>PN -&gt; AXT -&gt; FTG -&gt; HRQoL</b>                     | -0,113 (0,031)                    | (-0,187, -0,061)               | 0,244 (0,076)                     | (0,122, 0,426)                 |
| PN -> AXT -> DEP -> HRQoL                                     | -0,041 (0,034)                    | (-0,115, 0,02)                 | 0,088 (0,075)                     | (-0,045, 0,259)                |
| PN -> AXT -> FTG -> DEP -> HRQoL                              | -0,001 (0,004)                    | (-0,013, 0,003)                | 0,003 (0,008)                     | (-0,007, 0,028)                |
| <b>PN -&gt; FTG -&gt; HRQoL</b>                               | -0,073 (0,025)                    | (-0,131, -0,031)               | 0,158 (0,058)                     | (0,065, 0,299)                 |
| PN -> FTG -> DEP -> HRQoL                                     | -0,001 (0,003)                    | (-0,011, 0,002)                | 0,002 (0,006)                     | (-0,004, 0,022)                |
| PN -> DEP -> HRQoL                                            | -0,018 (0,017)                    | (-0,067, 0,005)                | 0,038 (0,039)                     | (-0,01, 0,152)                 |
| <b>SMM5: PN -&gt; FTG -&gt; DEP&gt;AXT -&gt; HRQoL</b>        |                                   |                                |                                   |                                |
| <b>PN -&gt; FTG -&gt; HRQoL</b>                               | -0,186 (0,042)                    | (-0,272, -0,11)                | 0,402 (0,103)                     | (0,223, 0,632)                 |
| PN -> FTG -> DEP -> HRQoL                                     | -0,024 (0,019)                    | (-0,064, 0,011)                | 0,052 (0,042)                     | (-0,023, 0,146)                |
| <b>PN -&gt; FTG -&gt; AXT -&gt; HRQoL</b>                     | -0,052 (0,023)                    | (-0,106, -0,016)               | 0,112 (0,051)                     | (0,031, 0,23)                  |
| <b>PN -&gt; FTG -&gt; DEP -&gt; AXT -&gt; HRQoL</b>           | -0,022 (0,011)                    | (-0,05, -0,007)                | 0,049 (0,024)                     | (0,015, 0,11)                  |
| PN -> DEP -> HRQoL                                            | -0,036 (0,031)                    | (-0,106, 0,016)                | 0,079 (0,069)                     | (-0,034, 0,238)                |
| <b>PN -&gt; DEP -&gt; AXT -&gt; HRQoL</b>                     | -0,034 (0,015)                    | (-0,07, -0,01)                 | 0,073 (0,034)                     | (0,021, 0,156)                 |
| <b>PN -&gt; AXT -&gt; HRQoL</b>                               | -0,03 (0,019)                     | (-0,082, -0,004)               | 0,065 (0,042)                     | (0,008, 0,181)                 |
| <b>SMM6: PN -&gt; DEP&gt;FTG -&gt; AXT -&gt; HRQoL</b>        |                                   |                                |                                   |                                |

|   |                                                     |                |                   |               |                  |
|---|-----------------------------------------------------|----------------|-------------------|---------------|------------------|
| 1 |                                                     |                |                   |               |                  |
| 2 |                                                     |                |                   |               |                  |
| 3 | PN -> DEP -> HRQoL                                  | -0,061 (0,048) | (-0,158 , 0,029)  | 0,131 (0,107) | (-0,065 , 0,355) |
| 4 | <b>PN -&gt; DEP -&gt; FTG -&gt; HRQoL</b>           | -0,065 (0,023) | (-0,12 , -0,03)   | 0,14 (0,054)  | (0,062 , 0,283)  |
| 5 | <b>PN -&gt; DEP -&gt; AXT -&gt; HRQoL</b>           | -0,056 (0,023) | (-0,111 , -0,017) | 0,122 (0,053) | (0,033 , 0,245)  |
| 6 | <b>PN -&gt; DEP -&gt; FTG -&gt; AXT -&gt; HRQoL</b> | -0,018 (0,009) | (-0,043 , -0,006) | 0,039 (0,021) | (0,011 , 0,096)  |
| 7 | <b>PN -&gt; FTG -&gt; HRQoL</b>                     | -0,121 (0,031) | (-0,192 , -0,07)  | 0,262 (0,073) | (0,146 , 0,44)   |
| 8 | <b>PN -&gt; FTG -&gt; AXT -&gt; HRQoL</b>           | -0,034 (0,016) | (-0,073 , -0,011) | 0,073 (0,035) | (0,021 , 0,16)   |
| 9 | <b>PN -&gt; AXT -&gt; HRQoL</b>                     | -0,03 (0,019)  | (-0,082 , -0,004) | 0,065 (0,042) | (0,008 , 0,181)  |

Notes: Table shows standardized indirect effects with bootstrapped standard errors; Paths in bold indicate statistically significant indirect effects; PN=Pain, DEP=Depression, AXT=Anxiety, FTG=Fatigue, HRQoL = Quality of Life; <sup>†</sup>Bias Corrected 95% confidence intervals; SMM=Serial Mediation Model

**Figure 1. Parallel Mediation Model (n=212).** Indirect effects of Pain on Global HRQoL through Anxiety, Fatigue and Depression. Note: Model is controlled for the gender. Standardized effects are presented. The effects on the direct path from Pain to Global HRQoL depict the Direct effect and the (Total effect). \* $p < .05$ , \*\*  $p < .01$ , \*\*\* $p < .001$

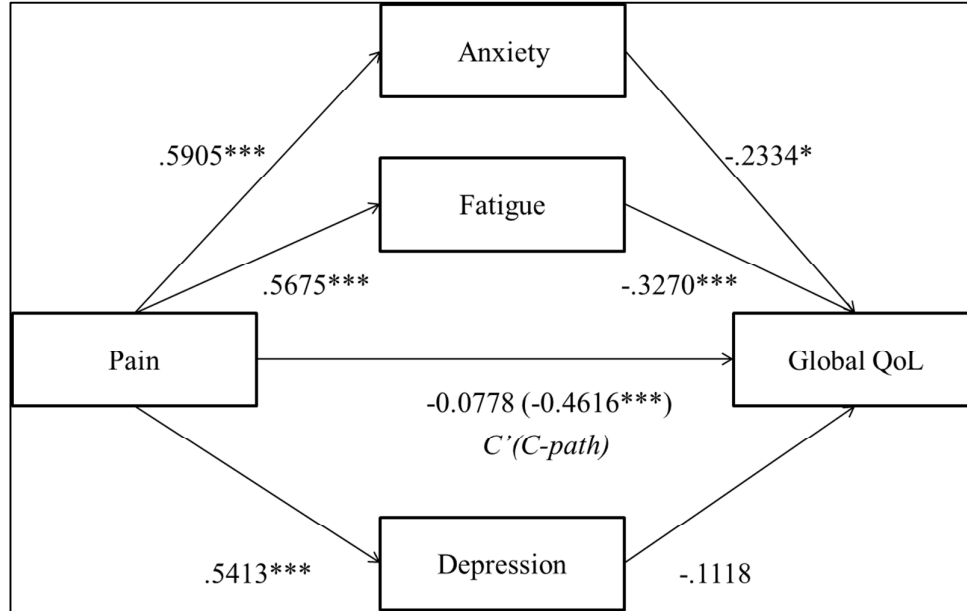

**Figure 2. Moderated Mediation Model (n=212).** Conditional Indirect effects on Gender (Female coded as 1 and Males as 0) of Pain on Global HRQoL through Depression. Note: Standardized effects are presented. The effects on the direct path from Pain to Global HRQoL depict the Conditional Direct Effects for each gender as well as the unconditional direct effect C' path (Total effect C-path). The effects of the moderator Gender to the paths represent the interaction slopes. Effects on the B-paths from the mediators to HRQoL represent the simple slopes. \*p < .05, \*\* p < .01, \*\*\*p < .001

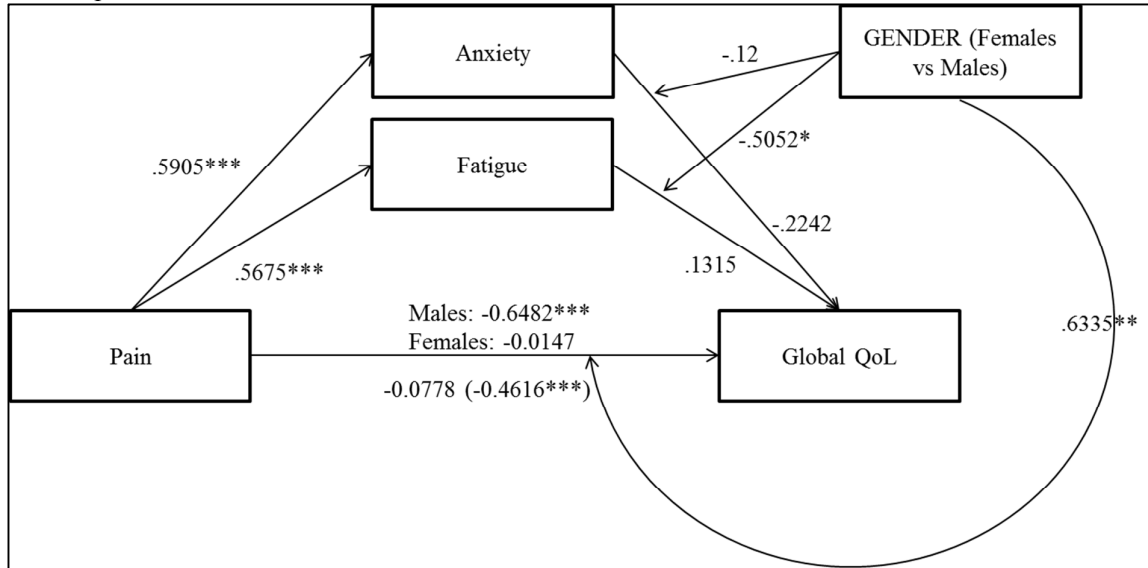

review only

**Figure 3. Serial mediation model 6 (SMM6) linking Pain and Quality of Life (n=212).** Note: Standardized effects are presented outside the parentheses with bootstrapped standard errors in the parentheses. C' = Direct Effect of Pain to HRQoL; C=Total effect of Pain to HRQoL; Total Indirect effect = -0.384, 95% biased corrected C.I.: -0.51, -0.284; Ratio of Indirect to Total effect: 0.832, 95% C.I.: 0.58-1.17; Model is controlled for Gender (i.e. type of cancer). \*p < .05, \*\* p < .01, \*\*\*p < .001. Global fit indices: Chi-square=10.27(3), p=0.069, CFI=0.938, RMSEA=0.10(0.04, 0.18).

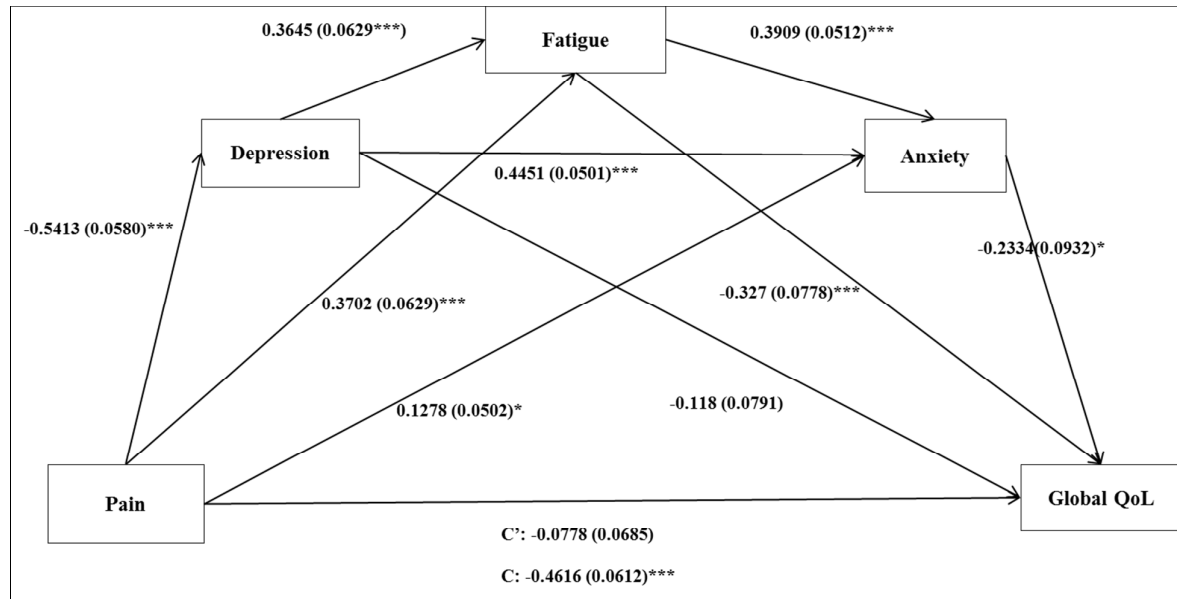

# BMJ Open

## Parallel and serial mediation analysis between Pain, Anxiety, Depression, Fatigue and Nausea, Vomiting and Retching within a randomised controlled trial in breast and prostate cancer patients

|                                 |                                                                                                                                                                                                                                                                                                           |
|---------------------------------|-----------------------------------------------------------------------------------------------------------------------------------------------------------------------------------------------------------------------------------------------------------------------------------------------------------|
| Journal:                        | <i>BMJ Open</i>                                                                                                                                                                                                                                                                                           |
| Manuscript ID                   | bmjopen-2018-026809.R1                                                                                                                                                                                                                                                                                    |
| Article Type:                   | Research                                                                                                                                                                                                                                                                                                  |
| Date Submitted by the Author:   | 30-Oct-2018                                                                                                                                                                                                                                                                                               |
| Complete List of Authors:       | Charalambous, Andreas; Cyprus University of Technology, Nursing; Turun Yliopisto, Nursing<br>Giannakopoulou, Margarita; National and Kapodistrian University of Athens, Nursing<br>Bozas, Evaggelos; National and Kapodistrian University of Athens, Nursing<br>Paikousis, Lefkios; Improvast, Statistics |
| <b>Primary Subject Heading</b>: | Oncology                                                                                                                                                                                                                                                                                                  |
| Secondary Subject Heading:      | Nursing                                                                                                                                                                                                                                                                                                   |
| Keywords:                       | symptom cluster, mediation analysis, prostate cancer, breast cancer                                                                                                                                                                                                                                       |
|                                 |                                                                                                                                                                                                                                                                                                           |

SCHOLARONE™  
Manuscripts

1  
2  
3 **Title Page**  
4

5 **Parallel and serial mediation analysis between Pain, Anxiety, Depression, Fatigue and**  
6 **Nausea, Vomiting and Retching within a randomised controlled trial in breast and**  
7 **prostate cancer patients.**  
8  
9

10 Authors  
11

12 Dr Andreas Charalambous (corresponding author), RN, PhD, Cyprus University of  
13 Technology  
14

15 15<sup>th</sup> Vragadinou Street, 3041, Limassol, Cyprus  
16

17 +35725002011 (tel)  
18

19 +35725002822 (Fax)  
20

21 [Andreas.charalambous@cut.ac.cy](mailto:Andreas.charalambous@cut.ac.cy)  
22  
23

24  
25  
26 Dr Margarita Giannakopoulou, RN, PHD, University of Athens  
27

28 123 Papadiamantopoulou Str, Athens Greece  
29

30 [mgiannak@nurs.uoa.gr](mailto:mgiannak@nurs.uoa.gr)  
31  
32

33  
34  
35 Dr Evaggelos Bozas, PhD, University of Athens  
36

37 123 Papadiamantopoulou Str, Athens Greece  
38

39 [ebozas@nurs.uoa.gr](mailto:ebozas@nurs.uoa.gr)  
40  
41

42  
43  
44 Dr Lefkios Paikousis, PhD (Statistics),  
45

46 Arkadias 7, Office 206, Nicosia 1048, Cyprus  
47

48 [lefkiospaikousis@yahoo.co.uk](mailto:lefkiospaikousis@yahoo.co.uk)  
49  
50

51  
52 **Keywords:** symptom clusters, prostate cancer, breast cancer, anxiety, pain, depression,  
53 fatigue  
54  
55

56  
57  
58 **Word count:** 4731  
59  
60

## Abstract

### Objective

Cancer treatment is a particularly stressful period for the patient. The reasons vary and include fear of treatment outcome as well as treatment induced side-effects. The patient frequently experiences simultaneously various side-effects resulting in a diminishing of the patient's health related quality of life-HRQoL. The study provides evidence on the co-occurrence and interrelations between pain, anxiety, depression and fatigue in breast and prostate cancer patients.

### Design

This paper presents a secondary analysis of the data from a randomised control trial designed to test the effectiveness of Guided Imagery and Progressive Muscle Relaxation on pain, fatigue, anxiety and depression. Non-parametric bootstrapping analyses were used to test the mediational model of Anxiety, Fatigue and Depression as parallel mediators of the relationship between Pain and HRQoL. The ClinicalTrials.gov NCT01275872

### Setting

The study was undertaken at the home setting

### Participants

In total 208 patients were included in the study (assigned equally in two groups), referred at the out-patient clinics of the three participating cancer care centres.

### Results

The three mediators fully mediate the relationship between Pain and HRQoL ( $IE_{\text{overall}} = 0.3839$ , 95% C.I.: LL=-0.5073, UL=-0.2825) indicating that patients with increased Pain are



1  
2  
3 likely to have higher levels of Anxiety, Fatigue and Depression. Gender significantly  
4 moderated the mediational effect of Fatigue (IMM=-0.2867 SE=0.1526, LL=-0.6127, UL=-  
5 0.0226) but did not moderate mediational effect of Anxiety (IMM=-0.0709, SE=0.1414,  
6 LL=-0.3459, UL=+0.2089). The results show that the three mediators in a serial causal order  
7 fully mediate the relationship between Pain and HRQoL ( $IE_{\text{overall}}=-0.384$ , 95% C.I.: LL=-  
8 0.51, UL=-0.284) and the ratio of the overall indirect effect to the total effect, is 0.8315 (95%  
9 CI: LL=0.5683, UL=1.1718).

## 20 **Conclusion**

21  
22  
23 This work provides evidence that targeting fatigue, anxiety and depression may have a  
24 meaningful effect on pain as a related symptom and potentially have a positive impact on  
25 HRQoL of breast and prostate cancer patients.  
26  
27  
28  
29  
30  
31  
32  
33  
34  
35  
36  
37  
38  
39  
40  
41  
42  
43  
44  
45  
46  
47  
48  
49  
50  
51  
52  
53  
54  
55  
56  
57  
58  
59  
60

### Strengths and Limitations of the Study

- Understanding the mediating effects of symptoms within a cluster will explain how these are manifested in clinical practice.
- The findings will have important clinical implications and could guide symptom cluster management strategies.
- The study provided evidence that as part of a management strategy, by targeting fatigue, anxiety and depression may have a meaningful effect on pain.
- Rigorous design and implementation allow for the generalizability of the findings in these group of patients.
- The unavailability of longitudinal data limits the support of a definite model, which would demonstrate if the correlations between symptoms found in this study are stable over time.

## Introduction

Cancer treatments and cancer itself are a source of many symptoms and side-effects [1-2] It is reported that on average cancer patients experience 11 to 13 concurrent symptoms, whilst for patients with advanced disease the number can be even greater [3]. Often these symptoms are related to each other, called symptom clusters (SCs) or symptom constellations[3]. Dodd et al[4-6] defined symptom cluster as 3 concurrent and related symptoms that may or may not have a common etiology. However, the authors suggested that a cluster can be composed of just 2 or more symptoms that form a stable group[3]. Symptoms can be related through a common mechanism or etiology, by sharing common variance, or by producing different outcomes than individual symptoms.

The impact of these clusters can be accumulative and debilitating for the patient and far more serious and persistent than single symptoms. Their concurrent presence make their clinical management complex and challenging. As a result, these clusters can affect the patient's overall Health Related Quality of Life-HRQoL [7] and significantly affect the patient's sense of wellbeing and his or her physical and social functions [8].

A number of studies have tried to record the most common clusters in various cancer types[4,9], however due to the lack of agreement about a robust, clinically relevant definition of SCs, their results should be interpreted with caution. Although the groups of symptoms that tended to cluster were identified, there is limited consistency in the way in which these SCs and their associated variables were identified[1].

Preceding studies, again by drawing on the weaknesses of the clinical definition of a SC, they provide limited information towards understanding the way (or ways) the symptoms are actually correlated to each other or to other variables (i.e. HRQoL). Most of the models

1  
2  
3 available adopt a serial mediation approach to the study of these clusters, suggesting a rather  
4  
5 linear correlation between the symptoms.  
6  
7

8 According to the definition by Dodd et al[4] for example, a cluster of pain, fatigue and  
9  
10 insomnia is presented as a legitimate one. However the authors supported that pain leads to  
11  
12 fatigue and in turn insomnia and this is a rather linear representation. Therefore the rationale  
13  
14 for examining these symptom clusters within the mediational models is to explicate whether  
15  
16 these symptoms can have an alternative way of interaction other than the one suggested in a  
17  
18 linear way. What is further lacking in the current research is the role of other possible  
19  
20 mediators such as cancer diagnoses which is also explored within this study.  
21  
22  
23  
24

25 These limitations are present with other SCs that have been identified so far in the literature  
26  
27 leaving a gap to the best understanding of this phenomenon but most importantly to the way  
28  
29 it can be best clinically managed. When interventions are directed to ameliorate a particular  
30  
31 symptom within a cluster, other symptoms within the cluster may be relieved. However this  
32  
33 evidence is not available to the best of our knowledge in the suggested mediational models  
34  
35 available in the literature. As a result, current practice is driven based on *a priori* assumptions  
36  
37 about the relationships among symptoms resulting in targeting the “dominant” symptom. In  
38  
39 the previous example, pain would have been identified as a “dominant” symptom and  
40  
41 therefore secondary attention is attributed to any other symptom that co-occurs.  
42  
43  
44  
45  
46

47 These *a priori* assumptions are however not based on scientific evidence but rather have been  
48  
49 established on clinical experience. However, a symptom cluster experienced by the patient  
50  
51 creates a complex condition where pain is rarely reported as a single symptom, but as a  
52  
53 distressing symptom is reported and addressed in a timely manner. However, the lack of  
54  
55 knowledge in the ways symptoms might correlate to each other and with other variables, the  
56  
57 question remains whether the dominant symptom in these situations is indeed pain. The  
58  
59  
60

1  
2  
3 question that also arises is whether there would be a clinical benefit if for example pain and  
4  
5 fatigue are correlated and interventions were specifically designed to target both symptoms.  
6  
7 The researchers so far had hypothesised that it is pain and this has become the common  
8  
9 practice dominating the current clinical management of this specific SC. This study  
10  
11 hypothesises that in the mediational models to be tested within this cluster of symptoms,  
12  
13 fatigue, anxiety and depression will be identified as mediating factors in the pain HRQoL  
14  
15 linkage. Furthermore, the study hypothesises that the mediation role of anxiety, depression  
16  
17 and fatigue will differ between the breast cancer and prostate cancer diagnoses.  
18  
19  
20  
21

## 22 Aim

23  
24  
25 The aim of this study was to provide evidence on the co-occurrence of and interrelations  
26  
27 between symptoms occurring as part of a cluster in two groups of patients diagnosed with  
28  
29 breast and prostate cancer.  
30  
31

## 32 Methods

33  
34  
35 The data for the purpose of this paper came from a Randomised Control Trial  
36  
37 (NCT01275872) designed to test the effectiveness of Guided Imagery (GI) and Progressive  
38  
39 Muscle Relaxation (PMR) on a cluster of symptoms reported by patients diagnosed with  
40  
41 breast or prostate cancer when receiving chemotherapy[10]. The patients in the study  
42  
43 reported the following symptoms: fatigue, pain, nausea, vomiting and retching, anxiety and  
44  
45 depression.  
46  
47  
48  
49

## 50 Measurements

51  
52  
53 The data were collected through the use of appropriate valid and reliable measures. The pain  
54  
55 intensity was assess through a 10-point numeric rating scale (NRS) for pain where 0 indicated  
56  
57  
58  
59  
60

1  
2  
3 the absence of pain and 10 indicated the worst experienced level of pain. Within the cancer  
4 context, NRS used to assess the intensity of pain have a proven validity and reliability [11].  
5  
6

7  
8 The Cancer Fatigue Scale (CFS)[12], was used to assess the participants' levels of fatigue.  
9

10 The CFS consists of three dimensions with 15 items that assess patients' responses on  
11 physical, affective, and cognitive aspects of their daily living. A 5-point Likert scale is used  
12 to assess each of the items where 1 denotes "not at all" to 5 which denotes "very much". The  
13 possible scores range from 0 to 28 for the physical, 0 to 16 for the affective, and 0 to 16 for  
14 the cognitive subscale. The CFS had good stability (average test-retest reliability  $r = 0.69$ ,  $P$   
15  $< 0.001$ ) and good internal consistency (Cronbach's alpha coefficient for all 15 items =  
16 0.88)[13].  
17  
18  
19  
20  
21  
22  
23  
24  
25  
26

27 Nausea and vomiting was assess through the Revised Rhodes index of nausea, vomiting and  
28 retching (INVR)[14] which consists of eight 5-point self-reported items designed to assess  
29 subjective and objective factors of nausea, vomiting and retching. The validity and reliability  
30 of the INVR in cancer patients has been demonstrated in preceding studies [15].  
31  
32  
33  
34  
35  
36

37 The levels of anxiety were assessed with the Zung self-rating anxiety scale-SAS which  
38 contains 20 items that assess physiological and psychological symptoms commonly  
39 associated with anxiety, and each item is answered on a 4-point Likert-type scale ranging  
40 from "never" to "always" [16]. Raw scores sum to 20–44 that signify normal anxiety levels,  
41 45–59 signifying mild to moderate anxiety levels, 60–74 signifying moderate to severe  
42 anxiety levels, and finally 75–80 indicating extreme anxiety levels. The scale's validity and  
43 reliability in cancer populations has been established in previous studies [17].  
44  
45  
46  
47  
48  
49  
50  
51  
52  
53

54 The Beck Depression Inventory-II has been utilised to assess patients' level of depression  
55 according to 21 items that correspond to a specific symptom common among people with  
56 depression [18]. Each item is evaluated on a 4-point scale ranging from zero to three. The  
57  
58  
59  
60

1  
2  
3 number of items' responses is summed to indicate the severity of depression as follows: 1–10  
4  
5 is considered normal, 11–16 indicated mild mood disturbance, 17–20 indicates borderline  
6  
7 clinical depression, 21–30 represents moderate depression, 31–40 represents severe  
8  
9 depression, and over 40 indicates extreme depression. The Beck Depression Inventory has  
10  
11 been extensively used in cancer populations where it demonstrated excellent validity and  
12  
13 reliability [19].  
14  
15

16  
17  
18 As with the majority of studies that explore symptom and symptom management, Quality of  
19  
20 Life is a frequently reported outcome that has been used to demonstrate the negative impact  
21  
22 of symptoms but also to reflect on the effectiveness of symptom management strategies.  
23  
24 HRQoL was included in the study due to the consistent evidence in the literature that the  
25  
26 cluster of symptoms is associated to poor levels of quality of life in patients diagnosed with  
27  
28 cancer[20, 21, 7]. Therefore, HRQoL has also being introduced in this study as a variable that  
29  
30 can be correlated to the studied symptoms. The HRQoL of the patients was assessed with the  
31  
32 EORTC QLQ-C30 module in addition to the module BR23 for breast cancer patients and the  
33  
34 module PR25 for prostate cancer patients. The EORTC QLQ-C30 includes five functional  
35  
36 scales (physical, role, cognitive, emotional, and social), three symptom scales (fatigue, pain,  
37  
38 and nausea and vomiting), a global health status/QoL scale, and a number of single items  
39  
40 assessing additional symptoms (dyspnoea, loss of appetite, insomnia, constipation and  
41  
42 diarrhoea) and perceived financial impact of the disease. The research items are assessed on a  
43  
44 Likert scale ranging from 1 to 4 (1 = “not at all”; 2 “a little”; 3 “quite a bit”; 4 “very much”).  
45  
46 Only the last two items assessing overall health and overall QOL are assessed on a scale  
47  
48 ranging from 1 (very poor) to 7 (excellent) [22]. The EORTC QLQ-C30 module has a proven  
49  
50 record of excellent validity and reliability across different cancer populations and languages  
51  
52 [23].  
53  
54  
55  
56  
57  
58  
59  
60

1  
2  
3 The BR23 is a breast-specific module that comprises of 23 questions to assess body image,  
4 sexual functioning, sexual enjoyment, future perspective, systemic therapy side effects, breast  
5 symptoms, arm symptoms and upset by hair loss. The questions of the module are assessed  
6 on a Likert scale ranging from 1 to 4 (1 = “not at all”; 2 =“a little”; 3 =“quite a bit”; 4 =“very  
7 much”). The validity and reliability of the BR23 module has been demonstrated in breast  
8 cancer populations [24].  
9

10  
11  
12 The PR 25 prostate-specific module consists of 25 items across 6 scales: urinary symptoms,  
13 incontinence aid, bowel symptoms, hormonal treatment-related symptoms, sexual active, and  
14 sexual function. The module includes 5 conditional questions, conditioned on the need of  
15 incontinence aid, and the status of being sexually active. The questions of the module are  
16 assessed on a Likert scale ranging from 1 to 4 (1 = “not at all”; 2 =“a little”; 3 =“quite a bit”;  
17 4 =“very much”). The validity and reliability of the PR25 module has been extensively  
18 demonstrated in prostate cancer populations [25].  
19  
20  
21  
22  
23  
24  
25  
26  
27  
28  
29  
30  
31  
32  
33  
34

### 35 **Sample**

36  
37  
38 As the rationale for this study was to test the correlations between symptoms identified as  
39 clusters, only the baseline (T0) measurements from both groups (intervention and control  
40 group) were included in the analysis. Based on predetermined criteria, 208 patients were  
41 included in the study. The sample included 104 female breast cancer patients (52 in control  
42 group + 52 in intervention group) and 104 prostate cancer patients (52 in control + 52 in  
43 intervention).  
44  
45  
46  
47  
48  
49  
50  
51

### 52 **Statistical analysis**

53  
54  
55 Non-parametric bootstrapping analyses[26] were deployed to test the mediational model of  
56 Anxiety, Fatigue and Depression as parallel mediators of the relationship between Pain and  
57 HRQoL. The nausea, vomiting and retching were excluded from the analyses as these were not  
58  
59  
60



1  
2  
3 found to correlate with the other symptoms. In these analyses, mediation is significant if the  
4  
5 95% Bias Corrected and accelerated confidence intervals (Lower Limit - LL), Upper Limit  
6  
7 (UL) for the indirect effect do not include 0[8, 26]. Moreover, separated regression analyses  
8  
9 were deployed to explore the statistical association of Cancer diagnosis and Age of the patient  
10  
11 with the HRQoL.  
12  
13

14  
15 Three mediation models are hypothesized and explored. The first model is a cancer diagnosis  
16  
17 adjusted parallel mediation model of indirect effect of Pain to HRQoL through Anxiety,  
18  
19 Fatigue and Depression. The second model is a moderated mediation model where the indirect  
20  
21 effects of the mediating factors are explored on each cancer diagnosis (conditional indirect  
22  
23 effects). The third model assumes a serial causal chain of the three mediators (serial mediation).  
24  
25 Six different causal chains were explored in this model.  
26  
27

28  
29 All involved variables in the analyses were standardized (z scores) before running the analyses,  
30  
31 hence standardized coefficients are reported for the Total, Direct and Indirect effects.  
32  
33

34  
35 Analysis was performed by utilising the PROCESS function v.2.16.1 in SPSS v.21. The model  
36  
37 4 (model as a parameter in the PROCESS function) was used for the parallel mediation model,  
38  
39 model 15 (moderated mediation) for the second mediation model and model 6 for the serial  
40  
41 mediation models[27].  
42  
43

44  
45 Model fit is also reported using the following: a chi-square (df, a comparative fit index  
46  
47 (CFI)>0.90 and a root mean square error approximation (RMSEA) of <0.10. The fit indices  
48  
49 were derived using the package *lavaan* in R[28].  
50  
51

## 52 53 **Ethics**

54  
55 The study was compliant to the Declaration of Helsinki and the protocol was approved by the  
56  
57 Cyprus National BioEthics Committee (ID CNBC/EP/2010/06). All participants signed an  
58  
59  
60

1  
2  
3 informed consent prior to their inclusion in the study. A detail presentation of the study's  
4 methodology is presented elsewhere[29].  
5  
6  
7

## 8 **Patient and Public Involvement statement**

9  
10  
11 As part of the study, a group of patients with relevant diagnoses were consulted in identifying  
12 the study's research question and relevant hypotheses. The patients were not directly involved  
13 in the design of the study nor in the recruitment and carrying out of the study. The authors  
14 intend to disseminate results to study participants through written summaries; academic outputs  
15 will be publicised through traditional media channels and social media.  
16  
17  
18  
19  
20  
21  
22  
23

## 24 **Results**

### 25 **Sample characteristics**

26  
27  
28 The sample consisted of 104 male (52 in the intervention group and 52 in the control group)  
29 and 104 female (52 in the intervention group and 52 in the control group) patients diagnosed  
30 with prostate and breast cancer. Eighty-six of the prostate cancer patients were diagnosed with  
31 stage T3a, Gleason score 8, and the remaining 18 with stage T3b, Gleason score 9. Patients  
32 with breast cancer were all diagnosed with clinical stage T3N1M0. Most of the participants  
33 belong to the 41-50 and the 51-60 age groups (38.9% and 26.4% respectively). Prostate cancer  
34 patients were treated either with a combination of androgen deprivation therapy (ADT) and  
35 adjuvant chemotherapy or with a combination of androgen deprivation therapy (ADT) and  
36 radiation (65.3% and 19.2% respectively).  
37  
38  
39  
40  
41  
42  
43  
44  
45  
46  
47  
48  
49  
50

51 The correlation analysis shows that HRQoL is negatively associated with Pain ( $r=-0.462$ ),  
52 Fatigue ( $r=-0.601$ ), Anxiety ( $r=-0.595$ ) and Depression ( $r=-0.510$ ) indicating that lower quality  
53 of life is associated with higher levels of the psychological aspects as well as Pain. Furthermore,  
54  
55  
56  
57  
58  
59  
60

Pain is positively correlated with all psychological aspects and negatively correlated with HRQoL (Table 1).

### **Covariates**

Age was not found to be statistically associated with the level of HRQoL either on the Total Effects model ( $b=-1.13$   $p=0.27$ , Predictors of HRQoL: Pain, Sex, Age) or on the Direct Effect model ( $b=-0.9903$   $p=0.2866$ , Predictors to HRQoL: Anxiety, Fatigue, Depression, Pain, Gender, Age).

Gender was found to be statistically associated with the HRQoL in the Total Effects model ( $b=-7.2972$   $p=0.0143$ ) indicating that female patients experienced lower quality of life compared to male patients. Therefore, gender which in this study also reflects the type of cancer, is included in the mediation models as a statistical control variable.

### **Parallel mediation model**

Results based on 5000 bootstrapped samples indicated that, controlling for the gender, whilst the total effect of Pain on HRQoL was significant ( $\beta_{\text{total}}=-0.4616$ ,  $SE=0.0612$ ,  $p<0.001$ ), the direct effect was not ( $\beta_{\text{direct}}=-.0778$ ,  $SE=0.0685$ ,  $p=0.2576$ ) and indirect effects (IE) are present (Figure 1).

Overall, the three mediators fully mediate the relationship between Pain and HRQoL ( $IE_{\text{overall}}=-0.3839$ , 95% C.I.:  $LL=-0.5073$ ,  $UL=-0.2825$ ) indicating that patients with increased Pain are more likely to have higher levels of Anxiety, Fatigue and Depression. Patients through the experience of high levels of Anxiety, Fatigue and Depression, are more likely to report lower levels of Quality of Life.

Two out of the three mediators were found to significantly contribute to the overall indirect effect. Specifically, there is a statistically significant indirect effect of Pain to HRQoL though

1  
2  
3 Anxiety ( $IE_{\text{anxiety}}=-0.1378$ , 95% C.I.: LL=-0.2615, UL=-0.0395), such that participants who  
4 indicated high levels of Pain were more likely to feel Anxiety, and through high levels of  
5 Anxiety, more likely to report lower levels of HRQoL. In addition, there is as statistically  
6 significant indirect effect of Pain to HRQoL through Fatigue ( $IE_{\text{fatigue}}=-0.1856$ , 95% C.I.: LL=-  
7 0.2716, UL=-0.1093), such that patients who indicated high levels of Pain were more likely to  
8 feel Fatigue, and through high levels of Fatigue, more likely to report reduced HRQoL.  
9 Depression does not mediate the relationship between Pain and HRQoL ( $IE_{\text{depression}}=-0.0605$ ,  
10 95% C.I.: LL=-0.1575, UL=+0.0289).

11  
12 Specific indirect effect contrasts between the proposed mediators do not show statistically  
13 significant difference between the indirect effects of Anxiety and Fatigue ( $b=0.0478$ , 95% CI:  
14 LL=-0.260, UL=0.0822). The ratio of the overall indirect effect to the total effect, is 0.8315  
15 (95% CI: LL=0.5683, UL=1.1718), while the ratio of the Anxiety and Fatigue indirect effects  
16 to the Total effect is 0.2985 (95% CI: LL=0.0758, UL=0.5711) and 0.4020 (LL=0.2230,  
17 UL=0.6317) respectively.

### 18 19 **Moderated mediation model – Cancer diagnosis moderation**

20  
21 The current analysis tests whether the indirect effect of Pain to HRQoL through Anxiety or  
22 Fatigue is moderated by cancer diagnosis, i.e. whether the mediation effect observed earlier, is  
23 statistically significantly different in prostate cancer patients and breast cancer patients.

24  
25 A moderated mediation model is explored where Anxiety and Fatigue act as parallel mediators  
26 and diagnosis as a moderator (Figure 2) to the mediation. The proposed model is under model  
27 15 of the PROCESS documentation[27] where the moderation effect takes place at the B-Path  
28 (Mediator to Dependent) and at the C- path (direct path: Independent to Dependent). Model 15  
29 (moderation effect not included to the A-path), was chosen over Model 59 (moderation effect  
30 on all paths) since separate regression analysis for the interaction of Diagnosis to the

1  
2  
3 relationship of the Independent (Pain) to the Mediators (Anxiety and Fatigue) did not reach  
4 statistical significance. The slope of the line relating the indirect effect to the moderator is the  
5  
6 “index of moderated mediation” (IMM)[28]. The statistical significance of the IMM effect is  
7  
8 assessed along with the conditional indirect effects across each cancer diagnosis.  
9  
10

11  
12  
13  
14 Diagnosis significantly moderated the mediational effect of Fatigue (IMM=-0.2867  
15 SE=0.1526, LL=-0.6127, UL=-0.0226) but did not moderate mediational effect of Anxiety  
16  
17 (IMM=-0.0709, SE=0.1414, LL=-0.3459, UL=+0.2089). This means that there is a meaningful  
18  
19 difference in the magnitude of the conditional indirect effects of each cancer diagnosis in the  
20  
21 mediation effect of Pain to HRQoL through Anxiety. Specifically, we observe that for prostate  
22  
23 cancer patients the conditional indirect effect is trivial and not statistically significant  
24  
25 ( $\beta=0.0746$ , SE=0.1474, LL=-0.1893, UL=+0.3853) but for breast cancer patients the  
26  
27 conditional indirect effect is stronger than prostate cancers' and statistically significant ( $\beta=-$   
28  
29 0.2121, SE=0.0434, LL=-0.307, UL=-0.1351) (Table 2). Fatigue is a significant mediator to  
30  
31 the relationship between Pain and HRQoL in breast cancer patients rather than prostate cancer  
32  
33 patients. There is no meaningful difference in the mediating effect of Anxiety for the  
34  
35 relationship between Pain and HRQoL between prostate and breast cancer diagnoses.  
36  
37  
38  
39  
40  
41  
42  
43  
44

#### 45 **Serial mediation model**

46  
47  
48 Serial mediation hypothesizes a causal chain linking of the mediators (Anxiety, Fatigue,  
49  
50 Depression), with a specified direction flow. For example, Pain, could increase Anxiety, which  
51  
52 in turn increases Depression which could in turn increase Fatigue and thus decrease Quality of  
53  
54 Life. (i.e., Pain->Anxiety->Depression-Fatigue->HRQoL).  
55  
56  
57  
58  
59  
60

1  
2  
3 The results show that the three mediators in a serial causal order (any order that is) **fully**  
4 **mediate** the relationship between Pain and HRQoL ( $IE_{\text{overall}}=-0.384$ , 95% C.I.: LL=-0.51, UL=-  
5  
6 0.284) and the ratio of the overall indirect effect to the total effect, is 0.8315 (95% CI:  
7  
8 LL=0.5683, UL=1.1718). The total indirect effect and the ratio to the total effect, both are the  
9  
10 same as in the parallel mediation model explored earlier.  
11  
12  
13  
14

15 Since three mediators were used, six different causal order models were produced (Table 3).  
16  
17 All six models were compared in terms of the significant path created by each different causal  
18  
19 order of the mediators. SMM 1, SMM 2 and SMM 4 yielded only three significant indirect  
20  
21 paths out of the 7 possible paths, whereas SMM 3, SMM 5 and SMM6 yielded 4, 5 and 6  
22  
23 significant paths respectively.  
24  
25  
26

27  
28 SMM 3, SMM 5 and SMM 6 yielded a significant indirect path involving all 3 mediators in a  
29  
30 causal chain. The path *Pain*->*Depression*->*Anxiety*->*Fatigue*->*HRQoL* in SMM 3 yielded the  
31  
32 highest ratio of indirect to total effect; 0.126 (95% C.I.: 0.056-0.248) among the three models  
33  
34 (Table 3).  
35  
36

37  
38 The indirect paths involving *Fatigue* and *Depression* (one after the other and vice-versa) were  
39  
40 statistically significant in 1 out of the 6 SMMs and specifically in SMM6.  
41  
42

43  
44 The indirect paths involving *Anxiety* and *Depression* (one after the other and vice-versa) was  
45  
46 statistically significant in 3 out of the 6 SMMs and specifically in SMM3, SMM5, and SMM6  
47  
48

49  
50 The indirect paths involving *Fatigue* and *Anxiety* (one after the other and vice-versa) were  
51  
52 statistically significant in all SMMs. This result means that increased Pain increases Fatigue  
53  
54 (or Anxiety) which in turn increase Anxiety (or Fatigue) resulting in a decreased Quality of  
55  
56 Life. The serial causal effect of these two mediators was found significant in any casual order  
57  
58 of the mediators in place.  
59  
60

1  
2  
3 Figure 3 depicts the effects of the direct paths linking pain to each mediator and among  
4 mediators resulting from the SMM 6 in which all the direct and indirect effects are statistically  
5 significant. The positive signs (+ve) of the effects are indicative of the increased Anxiety,  
6 Fatigue and Depression that increased Pain causes. Moreover, it shows that increased levels of  
7 each mediator is associated with a positive effect (i.e. increase) in the levels of the mediator  
8 with a direct connection. All indirect paths from Pain to HRQoL are negative, showing the  
9 reduction in HRQoL levels through the increase in the levels of the mediators. The SMM 6  
10 results show that the worst the Pain was the more it would contribute to Depression, higher  
11 depression resulted to higher Fatigue, higher Fatigue led to higher levels of Anxiety which in  
12 turn contributed to lower HRQoL.  
13  
14  
15  
16  
17  
18  
19  
20  
21  
22  
23  
24  
25  
26

## 27 Discussion

28  
29  
30 The aim of this study was to explore the co-occurrence and interrelations between symptoms  
31 that were reported by two cancer patient groups and HRQoL. With previous findings showing  
32 that these symptoms can be present in different clusters in these groups of patients [30,31],  
33 we specifically aimed to demonstrate that pain, depression, fatigue, nausea, vomiting and  
34 retching and anxiety can form a common symptom cluster over the course of breast cancer  
35 and prostate cancer treatment. The findings showed that with the exception of nausea,  
36 vomiting and retching, the symptoms of pain, fatigue, anxiety and depression formed a  
37 common symptom cluster in both breast and prostate cancer patients. The findings also  
38 showed that HRQoL is negatively associated with pain, fatigue, anxiety and depression. This  
39 suggests that with these two groups of patients the symptoms consisting of the cluster need to  
40 be addressed collectively not only emphasizing on pain management but also focusing on  
41 depression, anxiety and fatigue. This provides a more comprehensive symptom management  
42 to the patient with also a positive effect on the HRQoL.  
43  
44  
45  
46  
47  
48  
49  
50  
51  
52  
53  
54  
55  
56  
57  
58  
59  
60

1  
2  
3 Parallel, serial and moderate mediation analyses yielded interesting results in relation to  
4 symptom correlations. Parallel mediation analysis showed that the three mediators (fatigue,  
5 anxiety, and depression) fully mediate the relationship between Pain and HRQoL. However,  
6  
7 whilst Anxiety and Fatigue were found to significantly contribute to the overall indirect  
8 effect, Depression did not mediate the relationship between Pain and HRQoL. The results  
9  
10 demonstrated the mediating effect of these symptoms on pain and HRQoL, however at the  
11 same time the results supported the notion that “pain” needs to be targeted first. Although the  
12 data used for the analysis cannot support a definite model as these data were not longitudinal,  
13 however it does suggest that researchers and clinicians should consider these alternative  
14 correlations between symptoms and HRQoL. For example, cancer diagnosis significantly  
15 moderated the meditational effect of Fatigue but not Anxiety. Therefore, for prostate cancer  
16 patients conditional indirect effect is minimal but for breast cancer patients the effect is  
17 stronger and statistically significant. With the existence of many complex variable  
18 correlations being recorded in the literature in isolated symptom studies, these new findings  
19 suggest that conflicts in preceding studies may be resolved by the increased understanding of  
20 variable interaction in symptom clustering.  
21  
22  
23  
24  
25  
26  
27  
28  
29  
30  
31  
32  
33  
34  
35  
36  
37  
38  
39  
40

41 The exact underlying mechanisms by which symptoms correlate with each other are not to  
42 this date fully understood and this is an area that could contribute in the comprehensive  
43 management of symptom clusters through the development of effective multimodal  
44 interventions for breast and prostate cancer patients for use in the active treatment phase. A  
45 variety of non-pharmacological interventions have been proposed for treating pain, fatigue,  
46 depression and anxiety including exercise, psychosocial, cognitive behavioural, and  
47 nutritional[32-34]. However, most of these recommendations are proposed for use in single  
48 symptom management, perhaps with the exception of guided imagery and progressive muscle  
49 relaxation that its effectiveness was also tested in symptom cluster[29]. Further research is  
50  
51  
52  
53  
54  
55  
56  
57  
58  
59  
60



1  
2  
3 needed towards examining whether multimodal interventions can reduce pain and, in turn,  
4  
5 reduce depression, fatigue and anxiety.  
6  
7

8  
9 Clinical decision making in symptom management is traditionally driven by the type of the  
10  
11 symptom rather than its impact on the patient or its correlations to other symptoms that might  
12  
13 simultaneously be present. Preceding studies[35] consistently showed that emphasis is given  
14  
15 on pain management rather than management of other symptoms such as fatigue or anxiety  
16  
17 within a clinical situation where a symptom cluster manifests. The main problem with these  
18  
19 patterns in symptom management is that despite the knowledge that symptoms co-exist; these  
20  
21 are prioritised according to perceived importance. However, the correlation between the  
22  
23 symptoms is purposively not taken into consideration including the likelihood that by treating  
24  
25 for example Fatigue in breast cancer patients, the results of any pain management  
26  
27 intervention might be fortified as well as the positive impact on HRQoL. On the same  
28  
29 example, treating Fatigue in prostate cancer patients will most likely have no accumulating  
30  
31 effect on the patient's responsiveness to pain management interventions. This example  
32  
33 highlights that within the clinical setting such clinical decision making has also an impact on  
34  
35 the cost-effectiveness of the symptom management interventions, as resources can be  
36  
37 purposively allocated to other symptoms or variables that mediate pain and HRQoL to  
38  
39 maximise clinical management.  
40  
41  
42  
43  
44  
45

46  
47 The study has some limitations. The main limitation is the small sample size; however,  
48  
49 several statistically significant paths emerged and within-symptom paths were replicated  
50  
51 across both study samples (i.e cancer type groups). The unavailability of longitudinal data  
52  
53 limits the support of a definite model, which would demonstrate if the correlations between  
54  
55 symptoms found in this study are stable over time. However, the fact that the patients in the  
56  
57 study were all in the active treatment phase strengthens the generalisability of the results to  
58  
59 patients with prostate and breast cancer during this phase.  
60

1  
2  
3 The study demonstrated that pain, depression, fatigue, and anxiety tend to co-occur during the  
4 treatment phase, thus providing further evidence for this symptom cluster in two distinct  
5 samples of breast and prostate cancer patients. The study also showed the direct and indirect  
6 effects of this symptom cluster on the person's HRQoL. Parallel mediation analysis showed  
7 that the three mediators (fatigue, anxiety, and depression) fully mediate the relationship  
8 between Pain and HRQoL. Similarly, in a serial causal order, the three mediators fully  
9 mediate the relationship between Pain and HRQoL. The moderated mediation analysis  
10 showed that Diagnosis significantly moderated the mediational effect of Fatigue but did not  
11 moderate mediational effect of Anxiety. There are explicit clinical implications of the study's  
12 findings that include assessment, prevention, and intervention for anxiety, depression, fatigue  
13 and pain related to breast and prostate cancer treatment. This work provides preliminary  
14 evidence that targeting fatigue, anxiety and depression may have a meaningful effect on pain  
15 as a related symptom and potentially have a positive impact on HRQoL of patients with  
16 breast cancer and prostate cancer.  
17  
18  
19  
20  
21  
22  
23  
24  
25  
26  
27  
28  
29  
30  
31  
32  
33  
34  
35

### 36 **Funding**

37  
38  
39 This work was supported by the Cyprus University of Technology. Improvast provided  
40 support in the form of salaries for author LP. Publication was supported through the Open  
41 Access Author's Fund of the Cyprus University of Technology  
42  
43  
44  
45  
46

### 47 **Competing Interests**

48  
49  
50 None declared  
51  
52

### 53 **Data Statement**

54  
55  
56 Data are available from the Cyprus University of Technology given that the Cyprus National  
57 BioEthics Committee will grant access to data for researchers who meet the criteria doe  
58  
59  
60

1  
2  
3 access to confidential data. There are no unpublished data from this study. Data requests can  
4  
5 be sent to the corresponding author at [andreas.charalambous@cut.ac.cy](mailto:andreas.charalambous@cut.ac.cy)  
6  
7

### 8 **Author Statement**

9

10  
11 The authors of this paper have directly participated in all the stages of its preparation.

12  
13 Authorship statement: AC conceived and designed the study, analyzed, interpreted the data

14  
15 and approved the final manuscript. MG prepared all the draft versions of the manuscript.

16  
17 MG, LP recruited the participants, interpreted the data and edited and approved the final

18  
19 version of the manuscript. AC, MG, EB collected the data. LP performed the statistical

20  
21 analysis and interpretation of the data. AC, MG, LP interpreted the data, edited and approved

22  
23 the final version of the manuscript. AC, LP were responsible for the financial support.  
24  
25  
26  
27  
28  
29  
30  
31  
32  
33  
34  
35  
36  
37  
38  
39  
40  
41  
42  
43  
44  
45  
46  
47  
48  
49  
50  
51  
52  
53  
54  
55  
56  
57  
58  
59  
60

## References

1. Dong ST, Butow PN, Costa DSJ, et al: Symptom clusters in patients with advanced cancer: a systematic review of observational studies. *J Pain Symptom Manage* 48:411–450, 2014
2. Kim H-J, McGuire DB, Tulman L, et al: Symptom clusters: concept analysis and clinical implications for cancer nursing. *Cancer Nurs* 28:270–282, 2005
3. Miaskowski C, Dodd M, Lee K: Symptom Clusters: The New Frontier in Symptom Management Research [Internet]. *J Natl Cancer Inst Monogr* 2004:17–21,
4. Dodd MJ, Miaskowski C, Paul SM: Symptom clusters and their effect on the functional status of patients with cancer. [Internet]. *Oncol Nurs Forum* 28:465–70, 2001
5. Dodd M, Janson S, Facione N, et al: Advancing the science of symptom management. *J Adv Nurs* 33:668–676, 2001
6. Dodd MJ, Miaskowski C, Lee KA: Occurrence of symptom clusters. *J Natl Cancer Inst Monogr* 2004:76–78, 2004
7. Dong ST, Costa DSJ, Butow PN, et al: Symptom clusters in advanced cancer patients: an empirical comparison of statistical methods and the impact on quality of life. *J Pain Symptom Manage* 51:88–98, 2016
8. Preacher KJ, Rucker DD, Hayes AF: Addressing moderated mediation hypotheses: Theory, methods, and prescriptions. *Multivariate Behav Res* 42:185–227, 2007
9. Cheung WY, Le LW, Zimmermann C: Symptom clusters in patients with advanced cancers. *Support care cancer* 17:1223–1230, 2009

- 1  
2  
3 10. Charalambous A, Giannakopoulou M, Bozas E, et al: Guided imagery and progressive  
4 muscle relaxation as a cluster of symptoms management intervention in patients receiving  
5 chemotherapy: A randomized control trial. PLoS One 11:1–18, 2016  
6  
7
- 8  
9  
10  
11 11. Jensen MP: The Validity and Reliability of Pain Measures in Adults With Cancer. The  
12 Journal of Pain, 2003, 4: 2-21.  
13
- 14  
15  
16 12. Chang VT, Hwang SS, Feuerman M, et al: Symptom and quality of life survey of medical  
17 oncology patients at a veterans affairs medical center [Internet]. Cancer 88:1175–1183, 2000  
18  
19
- 20  
21  
22 13. Okuyama T, Akechi T, Kugaya A, Okamura H, Shima Y, Maruguchi M, et al.  
23 Development and validation of the cancer fatigue scale: a brief, three-dimensional, self-rating  
24 scale for assessment of fatigue in cancer patients. J Pain Symptom Manage. 2000; 19:5–14  
25  
26
- 27  
28  
29 14. Rhodes VA, McDaniel RW. The Index of Nausea, Vomiting, and Retching: a new format  
30 of the Index of nausea and vomiting. Oncol Nurs Forum 1999; 26:889-93  
31  
32
- 33  
34  
35 15. Lee J, Dibble SL, Pickett M, Luce J. Chemotherapy-Induced Nausea/Vomiting and  
36 Functional Status in Women Treated for Breast Cancer. Cancer Nurs. 2005; 28:249–255  
37  
38  
39 pmid:16046885  
40  
41
- 42  
43 16. Zung, W. W. K. A rating instrument for anxiety disorders. Psychosomatics 1971; 12(6),  
44 371–379.  
45  
46
- 47  
48 17. Li M, Wang L: The Associations of Psychological Stress with Depressive and Anxiety  
49 Symptoms among Chinese Bladder and Renal Cancer Patients: The Mediating Role of  
50 Resilience. PLoS ONE, 2016, 11: e0154729. doi:10.1371/journal.pone.0154729  
51  
52  
53
- 54  
55  
56 18. Beck, A.T., Steer, R.A., & Brown, G.K. Manual for the Beck Depression Inventory-II.  
57 San Antonio, TX: Psychological Corporation, 1996.  
58  
59  
60

- 1  
2  
3 19. Hopko DR, Bell JL, Armento ME, Robertson SM, Hunt MK, Wolf NJ, Mullane C: The  
4 phenomenology and screening of clinical depression in cancer patients. *J Psychosoc Oncol.*  
5  
6 2008, 26: 31-51.  
7  
8
- 9  
10 20. Nho J-H, Reul Kim S, Nam J-H: Symptom clustering and quality of life in patients with  
11 ovarian cancer undergoing chemotherapy [Internet]. *Eur J Oncol Nurs* 30:8–14, 2017  
12  
13
- 14 21. Choi S, Ryu E: Effects of symptom clusters and depression on the quality of life in  
15 patients with advanced lung cancer. *Eur J Cancer Care (Engl)* , 2016  
16  
17
- 18 22. Fayers P, Bottomley A on behalf of the EORTC Quality of Life Group and of the Quality  
19 of Life Unit: Quality of life research within the EORTC—the EORTC QLQ-C30. *European*  
20 *Journal of Cancer* 38, 2002: S125–S133.  
21  
22
- 23 23. Tan ML, Idris DB, Teo LW, Loh SY, Seow GC, Chia YY, Tin AS: Validation of EORTC  
24 QLQ-C30 and QLQ-BR23 questionnaires in the measurement of quality of life of breast  
25 cancer patients in Singapore. *Asia Pac J Oncol Nurs* 2014;1:22-32.  
26  
27
- 28 24. Sprangers MA, Groenvold M, Arraras JI, Franklin J, te Velde A, Muller M et al. The  
29 European Organization for Research and Treatment of Cancer breast cancer-specific  
30 quality-of-life questionnaire module: first results from a three-country field study. *J Clin*  
31 *Oncol* 1996; 14: 2756–2768.  
32  
33
- 34 25. van Andel G, Bottomley A, Fossa SD, et al: An international study of the EORTC QLQ-  
35 PR25: a questionnaire for assessing the health related quality of life of patients with prostate  
36 cancer. *Eur J Cancer* 2008;44:2418–24  
37  
38
- 39 26. Preacher KJ, Hayes AF: SPSS and SAS procedures for estimating indirect effects in  
40 simple mediation models. *Behav Res Methods* 36:717–731, 2004  
41  
42  
43  
44  
45  
46  
47  
48  
49  
50  
51  
52  
53  
54  
55  
56  
57  
58  
59  
60

- 1  
2  
3 27. Hayes AF: Introduction to Mediation, Moderation, and Conditional Process Analysis : A  
4  
5 Regression-Based Approach. New York, The Guilford Press, 2013  
6  
7  
8  
9 28. Rosseel Y. lavaan: An R Package for Structural Equation Modeling. *Journal of Statistical*  
10  
11 *Software* 48(2): 1-36, 2012.  
12  
13  
14 29. Charalambous A, Giannakopoulou M, Bozas E, et al: A Randomized Controlled Trial for  
15  
16 the Effectiveness of Progressive Muscle Relaxation and Guided Imagery as Anxiety  
17  
18 Reducing Interventions in Breast and Prostate Cancer Patients Undergoing Chemotherapy.  
19  
20 Evidence-based Complement Altern Med 2015, 2015  
21  
22  
23  
24 30. So WK, Marsh G, Ling WM, Leung FY, Lo JC, Yeung M, Li GK: The symptom cluster  
25  
26 of fatigue, pain, anxiety, and depression and the effect on the quality of life of women  
27  
28 receiving treatment for breast cancer: a multicenter study. *Oncol Nurs Forum*. 2009, 36(4):  
29  
30 E205-14. doi: 10.1188/09.ONF.E205-E214.  
31  
32  
33  
34 31. Dirksen SR, Belyea MJ, Wong W, Epstein DR: Transitions in Symptom Cluster  
35  
36 Subgroups Among Men Undergoing Prostate Cancer Radiation Therapy. *Cancer Nurs*. 2016,  
37  
38 39(1):3-11.  
39  
40  
41  
42 32. Wengström Y, Bolam KA, Mijwel S, et al: Optitrain: a randomised controlled exercise  
43  
44 trial for women with breast cancer undergoing chemotherapy. *BMC Cancer* 17:100, 2017  
45  
46  
47  
48 33. Finnegan-John J, Molassiotis A, Richardson A, Ream E. A systematic review of  
49  
50 complementary and alternative medicine interventions for the management of cancer-related  
51  
52 fatigue. *Integr Cancer Ther*. 2013;12:276-290  
53  
54  
55 34. Salas AS & Contreras JF, Armijo-Olivo S, Saltaji H, Watanabe S, Chambers T, Walter L,  
56  
57 Cummings GG. Non-pharmacological cancer pain interventions in populations with social  
58  
59 disparities: a systematic review and meta-analysis. *Support Care Cancer* 2015  
60

1  
2  
3 DOI 10.1007/s00520-015-2998-9  
4

5 35. Wilkie DJ, Ezenwa MO: Pain and symptom management in palliative care and at end of  
6 life. Nurs Outlook 60:357–364, 2012  
7  
8  
9

10  
11  
12  
13  
14  
15  
16  
17  
18  
19  
20  
21  
22  
23  
24  
25  
26  
27  
28  
29  
30  
31  
32  
33  
34  
35  
36  
37  
38  
39  
40  
41  
42  
43  
44  
45  
46  
47  
48  
49  
50  
51  
52  
53  
54  
55  
56  
57  
58  
59  
60

For peer review only



**Table 1: Pearson correlation coefficients between the variables**

|            | Pain    | Fatigue | Anxiety | Depression | HRQoL |
|------------|---------|---------|---------|------------|-------|
| Pain       | 1       |         |         |            |       |
| Fatigue    | ,567**  | 1       |         |            |       |
| Anxiety    | ,590**  | ,715**  | 1       |            |       |
| Depression | ,541**  | ,565**  | ,735**  | 1          |       |
| HRQoL      | -,462** | -,601** | -,595** | -,510**    | 1     |

\*\* p<0.001

For peer review only

**Table 2: Conditional indirect effect(s) of PAIN on HRQoL at Gender and Index of Moderated Mediation**

| Mediators                        | Moderator (Gender) | $\beta$ (SE)            | 95% Confidence Interval |
|----------------------------------|--------------------|-------------------------|-------------------------|
| Anxiety                          | Male               | 0.1324 (0.1314)         | (-0.4076, 0.1138)       |
|                                  | Female             | -0.2033 (0.0578) *      | (-0.3315, -0.1026)      |
| Fatigue                          | Male               | 0.0746 (0.1463)         | (-0.2015, 0.3574)       |
|                                  | Female             | -0.2121 (0.0436) *      | (-0.3034, -0.1282)      |
| <b>Moderated Mediation Index</b> |                    |                         |                         |
| Mediator                         | $\beta$ (SE)       | 95% Confidence Interval |                         |
| Anxiety                          | -0.0709 (0.143)    | (-0.3583, 0.2094)       |                         |
| Fatigue                          | -0.2867 (0.156) *  | (-0.5996, -0.0057)      |                         |

\* $p < 0.05$ , Bias corrected bootstrapped Confidence Intervals, 5000 bootstrap samples. Statistically significant moderated mediation occurs only for Fatigue. Although there is a significant conditional indirect effect for Females through the mediator Anxiety, the difference between the conditional indirect effect for Males is not significantly different than that of the Females.

**Table 3: Standardised indirect effects and ratio of indirect to total effects for the paths on the serial mediation models.**

|                                                               | Indirect effects of Pain on HRQoL |                                | Ratio of indirect to total effect |                                |
|---------------------------------------------------------------|-----------------------------------|--------------------------------|-----------------------------------|--------------------------------|
|                                                               | b (boot SE)                       | BC 95% CI [LB-UB] <sup>†</sup> | b (boot SE)                       | BC 95% CI [LB-UB] <sup>†</sup> |
| <b>SMM1: PN -&gt; AXT -&gt; DEP -&gt; FTG -&gt; HRQoL</b>     |                                   |                                |                                   |                                |
| <b>PN -&gt; AXT -&gt; HRQoL</b>                               | -0,138 (0,057)                    | (-0,268, -0,04)                | 0,299 (0,126)                     | (0,082, 0,581)                 |
| PN -> AXT -> DEP -> HRQoL                                     | -0,042 (0,033)                    | (-0,109, 0,022)                | 0,091 (0,074)                     | (-0,049, 0,239)                |
| <b>PN -&gt; AXT -&gt; FTG -&gt; HRQoL</b>                     | -0,108 (0,032)                    | (-0,186, -0,057)               | 0,234 (0,077)                     | (0,114, 0,424)                 |
| PN -> AXT -> DEP -> FTG -> HRQoL                              | -0,004 (0,01)                     | (-0,028, 0,013)                | 0,009 (0,022)                     | (-0,029, 0,063)                |
| PN -> DEP -> HRQoL                                            | -0,018 (0,018)                    | (-0,069, 0,005)                | 0,04 (0,04)                       | (-0,012, 0,153)                |
| PN -> DEP -> FTG -> HRQoL                                     | -0,002 (0,005)                    | (-0,019, 0,005)                | 0,004 (0,011)                     | (-0,01, 0,041)                 |
| <b>PN -&gt; FTG -&gt; HRQoL</b>                               | -0,071 (0,024)                    | (-0,13, -0,033)                | 0,154 (0,056)                     | (0,07, 0,296)                  |
| <b>SMM2: PN -&gt; FTG -&gt; AXT-DEP -&gt; HRQoL</b>           |                                   |                                |                                   |                                |
| <b>PN -&gt; FTG -&gt; HRQoL</b>                               | -0,186 (0,042)                    | (-0,272, -0,11)                | 0,299 (0,126)                     | (0,082, 0,581)                 |
| <b>PN -&gt; FTG -&gt; AXT -&gt; HRQoL</b>                     | -0,074 (0,032)                    | (-0,146, -0,023)               | 0,244 (0,077)                     | (0,119, 0,427)                 |
| PN -> FTG -> DEP -> HRQoL                                     | -0,002 (0,006)                    | (-0,022, 0,006)                | 0,088 (0,074)                     | (-0,047, 0,241)                |
| PN -> FTG -> AXT -> DEP -> HRQoL                              | -0,022 (0,018)                    | (-0,063, 0,011)                | 0,003 (0,008)                     | (-0,007, 0,029)                |
| <b>PN -&gt; AXT -&gt; HRQoL</b>                               | -0,064 (0,03)                     | (-0,141, -0,018)               | 0,158 (0,058)                     | (0,071, 0,304)                 |
| PN -> AXT -> DEP -> HRQoL                                     | -0,019 (0,017)                    | (-0,062, 0,008)                | 0,002 (0,005)                     | (-0,004, 0,024)                |
| PN -> DEP -> HRQoL                                            | -0,018 (0,017)                    | (-0,067, 0,005)                | 0,038 (0,039)                     | (-0,012, 0,147)                |
| <b>SMM3: PN -&gt; DEP&gt;AXT -&gt; FTG-- -&gt; HRQoL</b>      |                                   |                                |                                   |                                |
| PN -> DEP -> HRQoL                                            | -0,061 (0,048)                    | (-0,156, 0,03)                 | 0,131 (0,106)                     | (-0,072, 0,343)                |
| <b>PN -&gt; DEP -&gt; AXT -&gt; HRQoL</b>                     | -0,074 (0,031)                    | (-0,15, -0,021)                | 0,161 (0,07)                      | (0,044, 0,324)                 |
| PN -> DEP -> FTG -> HRQoL                                     | -0,006 (0,015)                    | (-0,043, 0,018)                | 0,014 (0,032)                     | (-0,038, 0,094)                |
| <b>PN -&gt; DEP -&gt; AXT -&gt; FTG -&gt; HRQoL</b>           | -0,058 (0,019)                    | (-0,105, -0,028)               | 0,126 (0,047)                     | (0,057, 0,248)                 |
| <b>PN -&gt; AXT -&gt; HRQoL</b>                               | -0,064 (0,029)                    | (-0,138, -0,019)               | 0,138 (0,065)                     | (0,042, 0,306)                 |
| <b>PN -&gt; AXT -&gt; FTG -&gt; HRQoL</b>                     | -0,05 (0,017)                     | (-0,094, -0,025)               | 0,108 (0,038)                     | (0,053, 0,212)                 |
| PN -> FTG -> HRQoL                                            | -0,071 (0,024)                    | (-0,13, -0,033)                | 0,154 (0,056)                     | (0,07, 0,296)                  |
| <b>SMM4: PN -&gt; AXT -&gt; FTG -&gt; DEP&gt; -&gt; HRQoL</b> |                                   |                                |                                   |                                |
| <b>PN -&gt; AXT -&gt; HRQoL</b>                               | -0,138 (0,056)                    | (-0,262, -0,04)                | 0,299 (0,125)                     | (0,076, 0,578)                 |
| <b>PN -&gt; AXT -&gt; FTG -&gt; HRQoL</b>                     | -0,113 (0,031)                    | (-0,187, -0,061)               | 0,244 (0,076)                     | (0,122, 0,426)                 |
| PN -> AXT -> DEP -> HRQoL                                     | -0,041 (0,034)                    | (-0,115, 0,02)                 | 0,088 (0,075)                     | (-0,045, 0,259)                |
| PN -> AXT -> FTG -> DEP -> HRQoL                              | -0,001 (0,004)                    | (-0,013, 0,003)                | 0,003 (0,008)                     | (-0,007, 0,028)                |
| <b>PN -&gt; FTG -&gt; HRQoL</b>                               | -0,073 (0,025)                    | (-0,131, -0,031)               | 0,158 (0,058)                     | (0,065, 0,299)                 |
| PN -> FTG -> DEP -> HRQoL                                     | -0,001 (0,003)                    | (-0,011, 0,002)                | 0,002 (0,006)                     | (-0,004, 0,022)                |
| PN -> DEP -> HRQoL                                            | -0,018 (0,017)                    | (-0,067, 0,005)                | 0,038 (0,039)                     | (-0,01, 0,152)                 |
| <b>SMM5: PN -&gt; FTG -&gt; DEP&gt;AXT -&gt; HRQoL</b>        |                                   |                                |                                   |                                |
| <b>PN -&gt; FTG -&gt; HRQoL</b>                               | -0,186 (0,042)                    | (-0,272, -0,11)                | 0,402 (0,103)                     | (0,223, 0,632)                 |
| PN -> FTG -> DEP -> HRQoL                                     | -0,024 (0,019)                    | (-0,064, 0,011)                | 0,052 (0,042)                     | (-0,023, 0,146)                |
| <b>PN -&gt; FTG -&gt; AXT -&gt; HRQoL</b>                     | -0,052 (0,023)                    | (-0,106, -0,016)               | 0,112 (0,051)                     | (0,031, 0,23)                  |
| <b>PN -&gt; FTG -&gt; DEP -&gt; AXT -&gt; HRQoL</b>           | -0,022 (0,011)                    | (-0,05, -0,007)                | 0,049 (0,024)                     | (0,015, 0,11)                  |
| PN -> DEP -> HRQoL                                            | -0,036 (0,031)                    | (-0,106, 0,016)                | 0,079 (0,069)                     | (-0,034, 0,238)                |
| <b>PN -&gt; DEP -&gt; AXT -&gt; HRQoL</b>                     | -0,034 (0,015)                    | (-0,07, -0,01)                 | 0,073 (0,034)                     | (0,021, 0,156)                 |
| <b>PN -&gt; AXT -&gt; HRQoL</b>                               | -0,03 (0,019)                     | (-0,082, -0,004)               | 0,065 (0,042)                     | (0,008, 0,181)                 |
| <b>SMM6: PN -&gt; DEP&gt;FTG -&gt; AXT -&gt; HRQoL</b>        |                                   |                                |                                   |                                |

|    |                                                     |                |                   |                                |
|----|-----------------------------------------------------|----------------|-------------------|--------------------------------|
| 1  |                                                     |                |                   |                                |
| 2  |                                                     |                |                   |                                |
| 3  | PN -> DEP -> HRQoL                                  | -0,061 (0,048) | (-0,158 , 0,029)  | 0,131 (0,107) (-0,065 , 0,355) |
| 4  | <b>PN -&gt; DEP -&gt; FTG -&gt; HRQoL</b>           | -0,065 (0,023) | (-0,12 , -0,03)   | 0,14 (0,054) (0,062 , 0,283)   |
| 5  | <b>PN -&gt; DEP -&gt; AXT -&gt; HRQoL</b>           | -0,056 (0,023) | (-0,111 , -0,017) | 0,122 (0,053) (0,033 , 0,245)  |
| 6  | <b>PN -&gt; DEP -&gt; FTG -&gt; AXT -&gt; HRQoL</b> | -0,018 (0,009) | (-0,043 , -0,006) | 0,039 (0,021) (0,011 , 0,096)  |
| 7  | <b>PN -&gt; FTG -&gt; HRQoL</b>                     | -0,121 (0,031) | (-0,192 , -0,07)  | 0,262 (0,073) (0,146 , 0,44)   |
| 8  | <b>PN -&gt; FTG -&gt; AXT -&gt; HRQoL</b>           | -0,034 (0,016) | (-0,073 , -0,011) | 0,073 (0,035) (0,021 , 0,16)   |
| 9  | <b>PN -&gt; AXT -&gt; HRQoL</b>                     | -0,03 (0,019)  | (-0,082 , -0,004) | 0,065 (0,042) (0,008 , 0,181)  |
| 10 |                                                     |                |                   |                                |
| 11 |                                                     |                |                   |                                |
| 12 |                                                     |                |                   |                                |
| 13 |                                                     |                |                   |                                |
| 14 |                                                     |                |                   |                                |
| 15 |                                                     |                |                   |                                |
| 16 |                                                     |                |                   |                                |
| 17 |                                                     |                |                   |                                |
| 18 |                                                     |                |                   |                                |
| 19 |                                                     |                |                   |                                |
| 20 |                                                     |                |                   |                                |
| 21 |                                                     |                |                   |                                |
| 22 |                                                     |                |                   |                                |
| 23 |                                                     |                |                   |                                |
| 24 |                                                     |                |                   |                                |
| 25 |                                                     |                |                   |                                |
| 26 |                                                     |                |                   |                                |
| 27 |                                                     |                |                   |                                |
| 28 |                                                     |                |                   |                                |
| 29 |                                                     |                |                   |                                |
| 30 |                                                     |                |                   |                                |
| 31 |                                                     |                |                   |                                |
| 32 |                                                     |                |                   |                                |
| 33 |                                                     |                |                   |                                |
| 34 |                                                     |                |                   |                                |
| 35 |                                                     |                |                   |                                |
| 36 |                                                     |                |                   |                                |
| 37 |                                                     |                |                   |                                |
| 38 |                                                     |                |                   |                                |
| 39 |                                                     |                |                   |                                |
| 40 |                                                     |                |                   |                                |
| 41 |                                                     |                |                   |                                |
| 42 |                                                     |                |                   |                                |
| 43 |                                                     |                |                   |                                |
| 44 |                                                     |                |                   |                                |
| 45 |                                                     |                |                   |                                |
| 46 |                                                     |                |                   |                                |
| 47 |                                                     |                |                   |                                |
| 48 |                                                     |                |                   |                                |
| 49 |                                                     |                |                   |                                |
| 50 |                                                     |                |                   |                                |
| 51 |                                                     |                |                   |                                |
| 52 |                                                     |                |                   |                                |
| 53 |                                                     |                |                   |                                |
| 54 |                                                     |                |                   |                                |
| 55 |                                                     |                |                   |                                |
| 56 |                                                     |                |                   |                                |
| 57 |                                                     |                |                   |                                |
| 58 |                                                     |                |                   |                                |
| 59 |                                                     |                |                   |                                |
| 60 |                                                     |                |                   |                                |

Notes: Table shows standardized indirect effects with bootstrapped standard errors; Paths in bold indicate statistically significant indirect effects; PN=Pain, DEP=Depression, AXT=Anxiety, FTG=Fatigue, HRQoL = Quality of Life; <sup>†</sup>Bias Corrected 95% confidence intervals; SMM=Serial Mediation Model

## Figure Legends

**Figure 1. Parallel Mediation Model (n=208).** Indirect effects of Pain on Global HRQoL through Anxiety, Fatigue and Depression. Note: Model is controlled for the cancer diagnosis. Standardized effects are presented. The effects on the direct path from Pain to Global HRQoL depict the Direct effect and the (Total effect). \* $p < .05$ , \*\*  $p < .01$ , \*\*\* $p < .001$

**Figure 2. Moderated Mediation Model (n=208).** Conditional Indirect effects on Cancer Diagnosis (Breast Cancer coded as 1 and Prostate Cancer as 0) of Pain on Global HRQoL through Depression. Note: Standardized effects are presented. The effects on the direct path from Pain to Global HRQoL depict the Conditional Direct Effects for each cancer diagnosis as well as the unconditional direct effect C' path (Total effect C-path). The effects of the moderator Diagnosis to the paths represent the interaction slopes. Effects on the B-paths from the mediators to HRQoL represent the simple slopes. \* $p < .05$ , \*\*  $p < .01$ , \*\*\* $p < .001$

**Figure 3. Serial mediation model 6 (SMM6) linking Pain and Quality of Life (n=212).** Note: Standardized effects are presented outside the parentheses with bootstrapped standard errors in the parentheses. C' = Direct Effect of Pain to HRQoL; C=Total effect of Pain to HRQoL; Total Indirect effect = -0.384, 95% biased corrected C.I.: -0.51, -0.284; Ratio of Indirect to Total effect: 0.832, 95% C.I.: 0.58-1.17; Model is controlled for Cancer Diagnosis. \* $p < .05$ , \*\*  $p < .01$ , \*\*\* $p < .001$ . Global fit indices: Chi-square=10.27(3),  $p=0.069$ , CFI=0.938, RMSEA=0.10(0.04, 0.18).

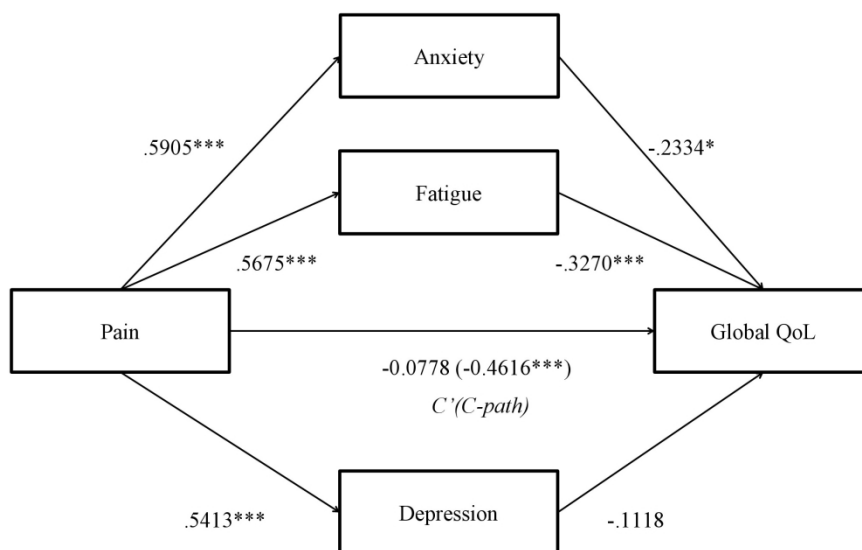

Figure 1. Parallel Mediation Model (n=208). Indirect effects of Pain on Global HRQoL through Anxiety, Fatigue and Depression. Note: Model is controlled for the cancer diagnosis. Standardized effects are presented. The effects on the direct path from Pain to Global HRQoL depict the Direct effect and the (Total effect). \*p < .05, \*\* p < .01, \*\*\*p < .001

223x134mm (300 x 300 DPI)

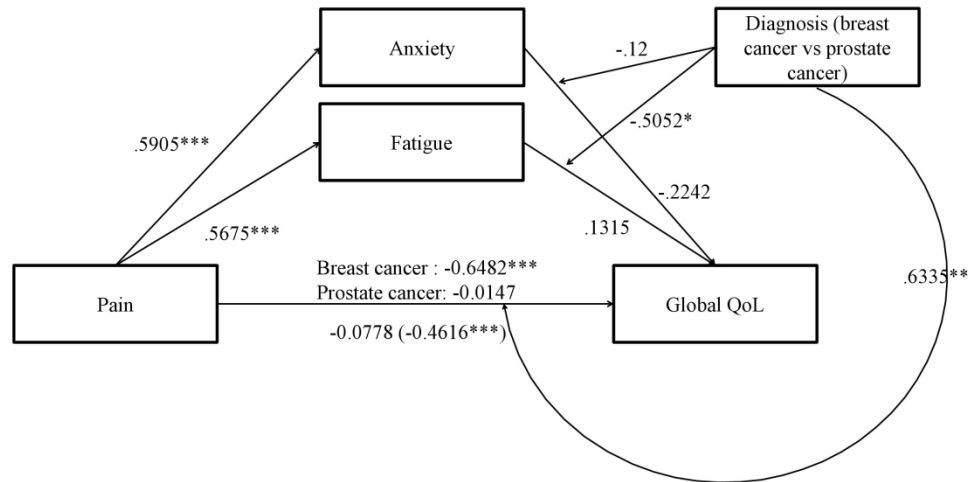

Figure 2. Moderated Mediation Model (n=208). Conditional Indirect effects on Cancer Diagnosis (Breast Cancer coded as 1 and Prostate Cancer as 0) of Pain on Global HRQoL through Depression. Note: Standardized effects are presented. The effects on the direct path from Pain to Global HRQoL depict the Conditional Direct Effects for each cancer diagnosis as well as the unconditional direct effect C' path (Total effect C-path). The effects of the moderator Diagnosis to the paths represent the interaction slopes. Effects on the B-paths from the mediators to HRQoL represent the simple slopes. \*p < .05, \*\* p < .01, \*\*\*p < .001

239x133mm (300 x 300 DPI)

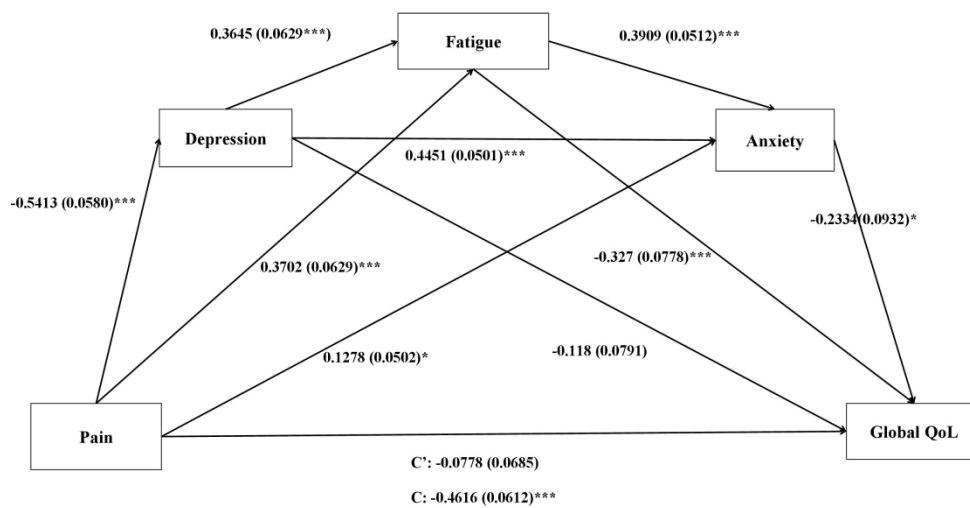

Figure 3. Serial mediation model 6 (SMM6) linking Pain and Quality of Life (n=212). Note: Standardized effects are presented outside the parentheses with bootstrapped standard errors in the parentheses. C' = Direct Effect of Pain to HRQoL; C=Total effect of Pain to HRQoL; Total Indirect effect = -0.384, 95% biased corrected C.I.: -0.51, -0.284; Ratio of Indirect to Total effect: 0.832, 95% C.I.: 0.58-1.17; Model is controlled for Cancer Diagnosis. \*p < .05, \*\* p < .01, \*\*\*p < .001. Global fit indices: Chi-square=10.27(3), p=0.069, CFI=0.938, RMSEA=0.10(0.04, 0.18).

243x129mm (300 x 300 DPI)
